1 **JIP4 is recruited by the phosphoinositide-binding protein**  
2 **Phafin2 to promote recycling tubules on macropinosomes**

3

4 Kia Wee Tan<sup>1,2</sup>, Viola Nähse<sup>1,2</sup>, Coen Campsteijn<sup>3</sup>, Andreas Brech<sup>1,2</sup>, Kay Oliver Schink<sup>1,2\*</sup>, and  
5 Harald Stenmark<sup>1,2\*</sup>

6

7 <sup>1</sup> *Centre for Cancer Cell Reprogramming, Faculty of Medicine, University of Oslo, Montebello,*  
8 *N-0379 Oslo, Norway*

9 <sup>2</sup> *Department of Molecular Cell Biology, Institute for Cancer Research, Oslo University*  
10 *Hospital, Montebello, 0379 Oslo, Norway*

11 <sup>3</sup> *Department of Molecular Medicine, Institute of Basic Medical Sciences, Faculty of Medicine,*  
12 *University of Oslo, Oslo, Norway*

13

14

15 \* Corresponding authors :

16

17 Dr. Kay Oliver Schink  
18 Department of Molecular Cell Biology  
19 Institute for Cancer Research  
20 Oslo University Hospital, Montebello  
21 0379 Oslo  
22 Norway  
23 [Kay.Oliver.Schink@rr-research.no](mailto:Kay.Oliver.Schink@rr-research.no)  
24 +47 22781821

25

26

27 Dr. Harald Stenmark  
28 Department of Molecular Cell Biology  
29 Institute for Cancer Research  
30 Oslo University Hospital, Montebello  
31 0379 Oslo  
32 Norway  
33 [h.a.stenmark@medisin.uio.no](mailto:h.a.stenmark@medisin.uio.no)  
34 +47 22781818

35

## 36 **Abstract**

37 Macropinocytosis allows cells to take up extracellular material in a non-selective manner. The  
38 molecular mechanisms that mediate recycling of membranes and transmembrane proteins from  
39 macropinosomes still need to be defined. Here we report that JIP4, a coiled-coil containing protein  
40 previously described to bind to microtubule motors, is recruited to retromer- and actin-containing  
41 tubulating subdomains on macropinosomes by binding to the PH domain of the phosphatidylinositol  
42 3-phosphate (PtdIns3P)-binding protein Phafin2. This recruitment is not shared by the closely related  
43 isoforms JIP3 and Phafin1. Disruption of Phafin2 or PtdIns3P impairs JIP4 recruitment to  
44 macropinosomes whereas forced localization of Phafin2 to mitochondria causes mitochondrial  
45 targeting of JIP4. While knockout of JIP4 suppresses tubulation, overexpression enhances tubulation  
46 from macropinosomes. JIP4 knockout cells display increased retention of macropinocytic cargo in  
47 both early and late macropinosomes, consistent with a recycling defect. Collectively, these data  
48 identify JIP4 and Phafin2 as components of a tubular recycling pathway that operates from  
49 macropinosomes.

50

## 51 **Introduction**

52 Macropinocytosis is a process that enables cells to take up large amounts of extracellular fluid [1].  
53 This fluid is internalized into large vesicles which are called macropinosomes. During this process,  
54 large regions of plasma membrane and the proteins within are internalized. In order to preserve the  
55 composition of the plasma membrane, it is important that membranes and plasma membrane  
56 proteins are recycled and transported back to the cell surface.

57 Directly after internalization, macropinosomes frequently tubulate and bud off small vesicles [2]. This  
58 process, sometimes called “piranhalysis”, has frequently been observed in cells [3, 4], but the  
59 underlying mechanisms are poorly understood. Tubulation from vesicle membranes often requires  
60 the action of membrane-bending proteins such as sorting nexins [5]. One of these sorting nexins,  
61 SNX5, has been shown to regulate macropinocytosis [6, 7]. In addition, tubulation and the formation  
62 of vesicles typically require motor proteins which exert pulling forces on the nascent membrane  
63 tubule. Often, multiple motor proteins are involved in a “tug of war”, and by this generate forces  
64 which drive scission of the membrane [8].

65 This motor-driven tubule pulling and scission requires adaptor proteins, which link motor proteins to  
66 the tubule membrane. JIP4 is a coiled-coil protein which can bind to both dynein and kinesin motor  
67 proteins [9, 10]. It can also bind to the small GTPase ARF6 [11]. This binding has been proposed to  
68 control a motor switch which controls endocytic recycling during cytokinesis [9]. ARF6 and JIP3/JIP4

69 have also been shown to regulate endosomal recycling of the matrix metalloproteinase MT1-MMP  
70 [12]. The transmembrane protein TMEM55B recruits JIP4 to lysosomes to mediate long-distance  
71 lysosome transport [13]. This is especially important in neurons, and mutations in the *Drosophila*  
72 *melanogaster* homolog *sunday driver* affect axonal long distance transport [14]. Moreover, a recent  
73 preprint showed that tubulating lysosomes contain JIP4 [15].

74 Here, we show a novel role of JIP4 on tubulating macropinosomes. We show that the lipid-binding  
75 protein Phafin2 recruits JIP4 to retromer-containing tubules of tubulating macropinosomes in a  
76 phosphatidylinositol 3-phosphate (PtdIns3P)-dependent fashion. Deletion of JIP4 reduces tubulation  
77 from macropinosomes, accompanied by retention of fluid-phase cargo in early and late  
78 macropinosomes. Conversely, overexpression of both JIP4 and its recruiter Phafin2 leads to strongly  
79 enhanced tubulation. These results suggest that JIP4 is important for membrane recycling from  
80 newly-internalized macropinosomes by promoting membrane tubulation.

81

## 82 **Results**

83 We have recently identified the phosphoinositide-binding protein Phafin2 as a novel regulator of  
84 macropinosome formation [16]. Using a two-hybrid screen for Phafin2 interactors, we identified the  
85 protein JIP4 as a potential interactor of Phafin2 (Supplementary Table S1). This was interesting since  
86 JIP4 and its homolog JIP3 have been implicated in macropinocytosis [17], although their function has  
87 remained largely unknown.

88 We first confirmed the interaction of JIP4 with Phafin2 using yeast two-hybrid interaction assays with  
89 truncation mutants of Phafin2 against the identified interaction region in JIP4. Phafin2 contains a PH  
90 and a FYVE domain, which are both involved in lipid binding (Figure 1A). JIP4 interacts with Phafin2  
91 only via the Phafin2 PH domain (Figure 1B), as deletion of the PH domain, but not the FYVE domain  
92 abolished expression of the reporter gene. To extend these results to mammalian cells, we  
93 performed proximity biotinylation labeling using cell lines stably expressing APEX2-fusions of full  
94 length or deletion mutants of Phafin2, with cell lines expressing cytosolic or membrane anchored  
95 APEX2 serving as negative controls. Semi-quantitative mass spectrometry analysis showed that  
96 deletion of the PH domain of Phafin2 greatly impaired biotinylation of JIP4, while deletion of the  
97 FYVE domain, which is required for localization of Phafin2 to early macropinosomes, [16] did not  
98 (Figure 1C, Supplementary Table S2). Together, these experiments indicate that the FYVE domain of  
99 Phafin2 is not involved in the interaction with JIP4 and that a local membrane environment is not  
100 required.

101 To verify that full length JIP4 was also capable of interacting with Phafin2, we used yeast two-hybrid  
102 assays and immunoprecipitation. Full length JIP4, like the isolated interaction region previously  
103 identified, triggered expression of the reporter gene in the yeast two-hybrid assay (Figure 1D). To  
104 assess the interaction between Phafin2 and JIP4 in mammalian cells, we performed tandem affinity  
105 purification using lysates from RPE1 cells stably expressing Localization and Affinity Purification (LAP)  
106 tagged Phafin2. Semi-quantitative mass spectrometry analysis identified JIP4 as a strong interactor in  
107 these pulldowns, with a 28-fold enrichment for JIP4 compared to control cells expressing solely the  
108 LAPtag (Figure 1E, Supplementary Table S3). Conversely, we precipitated GFP-JIP4 from cell lysate of  
109 RPE1 cells stably expressing GFP-JIP4 using GFP-TRAP magnetic beads. Immuno-blotting with an anti-  
110 Phafin2 antibody showed that endogenous Phafin2 was co-precipitated with GFP-JIP4, but not with  
111 GFP alone (Figure 1F, Suppl. Fig. 1D).

112 We used live-cell microscopy to assess if Phafin2 and JIP4 localize to similar cellular structures.  
113 Phafin2 shows a biphasic localization to macropinosomes, one to nascent macropinosomes directly  
114 after scission from the membrane and one to macropinosomes that have matured into endosome-  
115 like vesicles (in this study we will refer to these as early macropinosomes, as they acquire markers of  
116 early endosomes) [16]. Interestingly, we found that JIP4 selectively co-localizes with Phafin2 at early  
117 macropinosomes but did not co-localize with Phafin2 on nascent macropinosomes (Figure 1G, H,  
118 Supplementary Video 1). This could suggest that a binding site of JIP4 is not accessible on newly-  
119 formed vesicles. Phafin2 requires PtdIns3P, generated by the PtdIns 3-kinase VPS34, to localize to  
120 early macropinosomes [16]. To test if macropinosome localization of JIP4 is dependent on Phafin2,  
121 we treated cells with the selective VPS34-inhibitor SAR405 [18] and assessed JIP4 localization.  
122 Addition of SAR405 led to a rapid displacement of both Phafin2 and JIP4 from the membrane (Figure  
123 1I, J), suggesting that JIP4 depends on Phafin2 for the macropinosome localization.

124 As a putative recruiter, modulation of Phafin2 protein levels by overexpression or ablation would be  
125 expected to affect JIP4 localization. We assessed endogenous JIP4 localization to early endosomes in  
126 wild-type, Phafin2 KO [16] or Phafin2 overexpressing RPE1 cells by immunostaining for JIP4 and the  
127 early-endosomal antigen EEA1 and quantifying JIP4 intensity in EEA1-labelled endosomes. We found  
128 that JIP4 showed reduced localization to early endosomes if Phafin2 was deleted. In contrast,  
129 overexpression of Phafin2 led to a strong recruitment of JIP4 to EEA1-positive endosomes (Figure 2A,  
130 B).

131 To further support that JIP4 is recruited by Phafin2, we used a chemical dimerization system to  
132 redirect Phafin2 to mitochondria and monitored the localization of JIP4. To this end, we expressed an  
133 FRB and fluorophore tagged Phafin2, a mitochondrially anchored 2xFKBP domain (Tom70-mTagBFP2-  
134 2xFKBP), and a fluorophore tagged JIP4 in RPE1 cells. FKBP and FRB domains heterodimerize in the

135 presence of rapamycin [19], allowing redirection of FRB-tagged Phafin2 to the mitochondria by  
136 adding rapamycin to the extracellular solution. Cells expressing all three components were first  
137 treated with SAR405, leading to a dissociation of Phafin2 and JIP4 from macropinosomes (Figure 2C,  
138 D). Addition of rapamycin caused FRB-tagged Phafin2 to be recruited to the mitochondria (Figure 2C,  
139 D). JIP4 was co-recruited with Phafin2 to the mitochondria, indicating that Phafin2 does not require  
140 additional co-factors to recruit JIP4. Taken together, these data indicate that interaction of JIP4 with  
141 Phafin2 is sufficient for its subcellular targeting.

142 Both Phafin2 and JIP4 have homologs in the human genome, Phafin1 and JIP3, which share a large  
143 degree of sequence homology (Figure 3A, B). It is often implied that JIP3 and JIP4 have similar  
144 functions [12, 17, 20, 21]. We therefore asked if they could functionally replace each other. First, we  
145 tested if Phafin1 or Phafin2 can bind to JIP3 using direct two-hybrid interaction assays. To this end,  
146 we isolated the region corresponding to the identified JIP4-Phafin2 interaction domain from JIP3  
147 based on the JIP3/JIP4 sequence homology. We did not observe any interaction of either Phafin1 or  
148 Phafin2 with JIP3 (Figure 3C). We also tested if Phafin1 can bind to JIP4 by two-hybrid interaction  
149 assays. Despite the high sequence homology between the PH domains of Phafin1 and Phafin2 (Figure  
150 3B), we did not observe any interaction between Phafin1 and JIP4 (Figure 3D). This suggests that the  
151 interaction between Phafin2 and JIP4 is specific.

152 We generated an RPE1 cell line deleted for JIP4 by CRISPR/Cas9 to facilitate further investigation.  
153 This cell line was verified by Sanger sequencing (Suppl. Fig 1A), immunoblotting (Suppl. Fig 1B) and  
154 immunostaining (Suppl. Fig 1C) and was used for all subsequent assays where a JIP4 KO is indicated.

155 To confirm the data obtained through two-hybrid interaction assays and to verify that the full length  
156 proteins do not contain interaction sites outside the two-hybrid tested regions, we coexpressed  
157 different combinations of Phafin1/2 and JIP3/4 in RPE1 cells. JIP3 and JIP4 dimerize through coiled-  
158 coil regions [10, 11, 22] and could form heterodimers in cells, and by this be recruited together. To  
159 account for this, we expressed GFP-tagged JIP3 together with either Phafin2 or Phafin1 in both wild-  
160 type cells and cells deleted for endogenous JIP4 and assayed JIP3 localization (Figure 3E). While  
161 Phafin1 – similarly to Phafin2 – localizes to macropinosomes, we did not observe any localization of  
162 JIP3 to these vesicles (Figure 3E). Conversely, we co-expressed mNeonGreen-JIP4 together with  
163 either Phafin2 or Phafin1 in cells deleted for endogenous JIP4. JIP4 was readily recruited to  
164 macropinosomes by Phafin2, but not by Phafin1 (Figure 3F). Taken together, these data show that  
165 Phafin2 interacts with JIP4. The Phafin2 homolog Phafin1 does not bind to JIP4, and the JIP4 homolog  
166 JIP3 is unable to bind to Phafin2.

167 As JIP4 localized specifically to early macropinosomes but not nascent macropinosomes, we next  
168 analysed JIP4 localization in relation to known early endosomal markers. To minimize the risk of

169 overexpression artefacts, we generated a stable cell line expressing mNeonGreen-tagged JIP4 under  
170 control of the weak PGK promoter. We found that JIP4 localizes to early macropinosomes, labelled  
171 by the small-GTPase RAB5. However, JIP4 did not localize to the whole macropinosome, but was  
172 restricted to small, tubular subregions of the macropinosome (Figure 4A, B, Supplementary Video 2).  
173 In order to further characterize these structures, we expressed a marker of PtdIns3P-containing  
174 membrane tubules, a tandem FYVE domain of the protein WDFY2 [23], together with JIP4. JIP4  
175 localized to mCherry-2xFYVE<sup>(WDFY2)</sup> labelled tubules (Figure 4C, D). In contrast, in cells deleted for the  
176 JIP4 recruiter Phafin2, this localization was largely lost (Figure 4C, D). We then asked if Phafin2 shows  
177 a similar localization to tubular structures. Halo-tagged Phafin2 was expressed in cells at a very low  
178 level together with mNeonGreen-JIP4. Using these weakly expressing cells, we observed that Phafin2  
179 labelled the limiting membrane of macropinosomes, but was enriched on tubular structures (Figure  
180 4E). JIP4 showed only minimal staining of the limiting membrane and was strongly concentrated at  
181 Phafin2-labelled macropinosome tubules (Figure 4E).

182 While these Phafin2 and JIP4 decorated structures resembled membrane tubules extruded from the  
183 limiting membrane of macropinosomes, the resolution of light microscopy cannot distinguish  
184 between organelle contact sites and emanating tubules. To verify that the JIP4-labelled tubules are  
185 continuous with the macropinosome membrane, we performed correlative light and electron  
186 microscopy (CLEM) using mNeonGreen-tagged JIP4. We first followed JIP4 localization together with  
187 Halo-2xFYVE<sup>(WDFY2)</sup> by live cell imaging and then chemically fixed the cell during imaging (Figure 5A,  
188 B). Fixed cells were processed for electron microscopy and micrographs for electron tomography  
189 were collected (Figure 5C). Reconstruction of these tomograms showed that the JIP4-labelled tubules  
190 formed continuous structures with the limiting membrane of the macropinosome (Figure 5D).

191 To characterize these tubular structures in detail, we examined the localization of JIP4 together with  
192 different markers of membrane tubules. JIP4 tubules emerged from actin-rich domains on the  
193 macropinosome (Figure 6A), which were also positive for the actin binding protein Coronin1B (Figure  
194 6B) and the large GTPase Dynamin2 (Figure 6C). JIP4-positive tubules also colocalized with subunits  
195 of the retromer complex, VPS26 and VPS35 (Figure 6D, E). The v-SNARE VAMP3, which is sorted into  
196 retromer-positive endosomal tubules, also colocalized with JIP4 (Figure 6F). Taken together, this  
197 indicates that JIP4 preferentially labels retromer-containing tubules, suggesting that it could be  
198 involved in retromer-dependent trafficking.

199 In order to investigate the role of JIP4 in trafficking, we next analyzed the phenotype of the JIP4  
200 knockout cells. We measured tubulation from Phafin2-positive macropinosomes (Figure 7A-D) in  
201 wild-type and JIP4 knockout cells expressing Phafin2. In addition, cells were transfected with either  
202 an empty vector or a JIP4 expressing plasmid. In order to gain a quantitative measurement of

203 tubulation, we measured the co-efficient of variation of the Phafin2 fluorescence over the limiting  
204 membrane of the macropinosome (Figure 7C). A higher variation of the fluorescence corresponds to  
205 more tubulation events, as these form bright nucleation spots directly at the limiting membrane.  
206 (Figure 7B, C). We found that, in comparison to wild-type cells, JIP4 knockout cells showed a small,  
207 but significant reduction of macropinosome tubulation in response to Phafin2 expression. In  
208 contrast, expression of both Phafin2 and JIP4 in wild-type and knockout cells led to a strong increase  
209 in macropinosome tubulation, suggesting that Phafin2 and JIP4 can act together to drive tubulation.

210 We have previously shown that Phafin2 is involved in nascent macropinosome formation [16], and  
211 JIP3 and JIP4 have previously been proposed to influence macropinocytosis [17]. We therefore tested  
212 if JIP4 is required to form macropinosomes from membrane ruffles. By tracking individual  
213 macropinosomes and measuring if they successfully matured into early macropinosomes, we found  
214 that loss of JIP4 did not affect early steps of macropinocytosis (Figure 7E, F). This is in line with the  
215 localization of JIP4, which only arrives at the macropinosome after maturation into an early  
216 macropinosome.

217 To measure fluid-phase uptake, we performed dextran uptake assays using both flow cytometry and  
218 fluorescence microscopy. Using both assays, we noted that JIP4 knockout cells showed significantly  
219 elevated intracellular dextran levels in comparison to wild-type cells (Figure 7G, H, I) after a 30min  
220 uptake period. We therefore asked if elevated levels of dextran could be detected in different  
221 compartments of the endocytic pathway. To this end, we generated stable cell lines expressing RAB5  
222 or LAMP1 in WT and JIP4 KO cells and measured dextran intensity within these compartments. In line  
223 with our previous findings, we observed increased dextran fluorescence in both Rab5 (Figure 8A, B)  
224 and LAMP1-positive (Figure 8C, D) vesicles, suggesting that more dextran is retained in  
225 endolysosomal vesicles in the absence of JIP4. In light of our observation that JIP4 KO cells do not  
226 show higher success rates of macropinosome formation and JIP4 does not localize to forming  
227 macropinosomes, this elevated intracellular dextran levels could be the result of reduced recycling  
228 from macropinosomes. This would be in line with the localization of JIP4 to retromer-containing  
229 macropinosome tubules.

230 Taken together, we report a novel, dynamic localization of JIP4, which depends on the lipid-binding  
231 protein Phafin2 on macropinosomes. JIP4 localizes to retromer-positive recycling tubules and is  
232 required for efficient tubulation.

233

234 **Discussion**

235 In the present study, we show that a previously uncharacterized region of JIP4 interacts with the PH  
236 domain of the phosphoinositide-binding protein Phafin2, recruiting JIP4 to early macropinosome  
237 membranes. Phafin2 binds PtdIns3P generated by the PtdIns 3-kinase VPS34 through its FYVE  
238 domain, which localizes it to endosomes and macropinosomes [24, 25]. Our data show that genetic  
239 ablation of Phafin2 or the removal of PtdIns3P disrupt the localization of JIP4 to macropinosomes.  
240 The recruitment of JIP4 by Phafin2 to membranes does not require other protein or lipid components  
241 found on macropinosomes, apart from that needed to anchor Phafin2 to the membrane. The JIP4  
242 homolog JIP3 is not recruited by Phafin2, nor is the Phafin2 homolog Phafin1 capable of recruiting  
243 either JIP3 or JIP4. Consistent with this specificity of Phafin2 for JIP4, the ablation of JIP4 did not  
244 interfere with the successful completion of macropinocytic internalization, in contrast to JIP3 which  
245 was reported to assist macropinosomes in moving through cortical actin [17].

246 We find that JIP4 is enriched at subdomains of the macropinosome from which membrane tubules  
247 are generated and that down- or up-regulating JIP4 levels suppresses or promotes tubulation,  
248 respectively. In line with previous studies that functionally implicate JIP4 in endocytic recycling [26],  
249 these JIP4 positive tubules contain transmembrane cargo, components of Retromer (a key endocytic  
250 recycling complex) [27], and emanate from actin-enriched subdomains on the macropinosome. JIP4  
251 knockout cells retained more of the fluid-phase marker dextran after macropinocytic uptake and this  
252 increased cargo retention was found in both early (RAB5) and late macropinosome (LAMP1)  
253 compartments.

254 While Phafin2 shows a biphasic localization to macropinosomes, once to nascent macropinosomes,  
255 and another to early macropinosomes [16], JIP4 only binds to Phafin2 at the early macropinosome  
256 stage. This suggests that the interaction site between Phafin2 and JIP4 might be inaccessible during  
257 the first phase of Phafin2 localization to macropinosomes. Our data do not exclude the possibility  
258 that other proteins may contribute to JIP4 localisation, perhaps in a combinatorial manner. Indeed,  
259 the binding site for Phafin2 on JIP4 is distinct from those of ARF6 [11], motor proteins, and RAB36  
260 [28]. Furthermore, it has been reported that the JIP3 ARF6-binding-domain only recognises clathrin-  
261 coated vesicles after uncoating [26]. While macropinosomes do not use clathrin, newly formed  
262 macropinosomes are coated in F-actin [16]. The steric hindrance mechanism proposed by Montagnac  
263 et al. for JIP3/ARF6 may therefore also apply to macropinosomes and the JIP4/Phafin2 recruitment.

264 We additionally observed that this interaction is specific for JIP4 and Phafin2. Phafin2 does not  
265 interact with JIP3, nor does Phafin1 bind to JIP4. This is important to note, since several other studies  
266 have proposed that JIP3 and JIP4 have overlapping functions, and some phenotypes are reported  
267 under double knockdown or knockout conditions [10, 12, 17, 20]. In comparative structural and  
268 biochemical analysis, the similarity of the first two coiled-coil regions has been noted [11, 17]. Our



269 data show that the Phafin2 recruitment mechanism distinguishes between the two isoforms.  
270 Likewise, despite the high sequence similarity between the Phafin1 and Phafin2 PH domains, only  
271 Phafin2 is competent to recruit JIP4.

272 We find that JIP4 does not localize to the whole macropinosome membrane, but preferably to  
273 tubules positive for retromer markers. This is in line with a previous study which described JIP4  
274 localization to late endosomes in close proximity to WASH, which organizes actin on retromer  
275 tubules and which reported that JIP3 and JIP4 are required for recycling of the matrix  
276 metalloprotease MT1-MMP via endosomal tubules [12].

277 Based on the described binding of JIP4 to motor proteins, it is tempting to speculate that the tubular  
278 localization of JIP4 might couple these membranes to the cytoskeleton and thereby drive tubule  
279 formation. Indeed, expression of Phafin2 in JIP4 knockout cells did result in reduced tubulation,  
280 whereas expression of both Phafin2 and JIP4 strongly enhanced tubulation. This suggests that  
281 Phafin2 and JIP4 act together to enhance tubulation from macropinosomes.

282 In our previous work, we found that Phafin2 is required during initial steps of macropinosome  
283 formation, and that loss of Phafin2 reduces macropinocytosis [16]. While JIP3 and JIP4 have been  
284 proposed to play a role in macropinocytosis, we did not observe any defects in macropinocytic fluid-  
285 phase uptake in cells deleted for JIP4. In contrast, we did observe enhanced intracellular levels of  
286 dextran in JIP4 KO cells, suggesting that these retain more dextran within the cell. This is in line with  
287 our observation that Phafin2 is required in early steps of macropinocytosis, whereas JIP4 recruitment  
288 only occurs after macropinosomes have successfully entered the cell and have matured into early  
289 macropinosomes. The increased intracellular dextran levels are consistent with a role of JIP4 in the  
290 formation of recycling carriers from macropinosomes.

291

## 292 **Acknowledgements**

293 We thank the Flow Cytometry Core Facility and the Advanced Light Microscopy Core Facility of Oslo  
294 University Hospital for technical assistance and access to instruments. We thank Eva Rønning for  
295 technical support with yeast two-hybrid assays, Trine Håve for technical support for the APEX2 and  
296 the LAPtag experiments, and Ulrikke Dahl Brinch for technical support in generating the low  
297 expressing Phafin2-Halo RPE1 cell line. We are grateful to members of the Stenmark Lab for  
298 discussions. We are grateful to Philippe Chavrier for sharing the JIP3 plasmid. K.O.S. was supported  
299 by a career fellowship from the South-Eastern Norway Regional Health Authority. H.S. was supported  
300 by an advanced grant from the European Research Council (project number 788954) and by research  
301 grants from the Norwegian Cancer Society and the South-Eastern Norway Regional Health Authority.

302 This work was partly supported by the Research Council of Norway through its Centres of Excellence  
303 funding scheme, project number 262652.

304

### 305 **Author contributions**

306 K.O.S and H.S. supervised the study and V.N. co-supervised the study. K.W.T and K.O.S conceived the  
307 study and designed experiments. K.W.T generated construct, lentivirus vectors and stable cell lines,  
308 performed all live cell imaging, two-hybrid experiments, immunoprecipitation experiment, image  
309 analysis and quantifications. K.O.S performed the initial two-hybrid experiments, generated  
310 constructs and helped with SIM imaging. V.N. generated stable cell lines, analyzed data and designed  
311 experiments. C.C performed APEX2- and LAP-Trap experiments and analyzed mass spectrometry  
312 data. A.B. performed electron microscopy. K.W.T, K.O.S. and H.S wrote the manuscript with input  
313 from all co-authors.

314

### 315 **References**

- 316 1. Swanson, J.A. and J.S. King, *The breadth of macropinocytosis research*. Philosophical  
317 transactions of the Royal Society of London. Series B, Biological sciences, 2019. **374**(1765): p.  
318 20180146-20180146.
- 319 2. King, J.S. and R.R. Kay, *The origins and evolution of macropinocytosis*. Philosophical  
320 transactions of the Royal Society of London. Series B, Biological sciences, 2019. **374**(1765): p.  
321 20180158-20180158.
- 322 3. Yoshida, S., et al., *Growth factor signaling to mTORC1 by amino acid-laden macropinosomes*.  
323 Journal of Cell Biology, 2015. **211**(1): p. 159-172.
- 324 4. Willingham, M.C. and S.S. Yamada, *A mechanism for the destruction of pinosomes in cultured*  
325 *fibroblasts. Piranhalysis*. Journal of Cell Biology, 1978. **78**(2): p. 480-487.
- 326 5. van Weering, J.R.T. and P.J. Cullen, *Membrane-associated cargo recycling by tubule-based*  
327 *endosomal sorting*. Seminars in Cell & Developmental Biology, 2014. **31**: p. 40-47.
- 328 6. Lim, J.P., R.D. Teasdale, and P.A. Gleeson, *SNX5 is essential for efficient macropinocytosis and*  
329 *antigen processing in primary macrophages*. Biology Open, 2012. **1**(9): p. 904-914.
- 330 7. Lim, J.P., et al., *A role for SNX5 in the regulation of macropinocytosis*. BMC cell biology, 2008.  
331 **9**: p. 58-58.
- 332 8. Castro-Castro, A., et al., *Cellular and Molecular Mechanisms of MT1-MMP-Dependent Cancer*  
333 *Cell Invasion*. Annual Review of Cell and Developmental Biology, 2016. **32**(1): p. 555-576.
- 334 9. Montagnac, G., et al., *ARF6 Interacts with JIP4 to Control a Motor Switch Mechanism*  
335 *Regulating Endosome Traffic in Cytokinesis*. Current Biology, 2009. **19**(3): p. 184-195.
- 336 10. Vilela, F., et al., *Structural characterization of the RH1-LZI tandem of JIP3/4 highlights RH1*  
337 *domains as a cytoskeletal motor-binding motif*. Scientific Reports, 2019. **9**(1): p. 16036.
- 338 11. Isabet, T., et al., *The structural basis of Arf effector specificity: the crystal structure of ARF6 in*  
339 *a complex with JIP4*. The EMBO Journal, 2009. **28**(18): p. 2835-2845.
- 340 12. Marchesin, V., et al., *ARF6-JIP3/4 regulate endosomal tubules for MT1-MMP exocytosis in*  
341 *cancer invasion*. 2015. **211**(2): p. 339-358.
- 342 13. Willett, R., et al., *TFEB regulates lysosomal positioning by modulating TMEM55B expression*  
343 *and JIP4 recruitment to lysosomes*. Nature communications, 2017. **8**(1): p. 1580-1580.

- 344 14. Bowman, A.B., et al., *Kinesin-Dependent Axonal Transport Is Mediated by the Sunday Driver*  
345 *(SYD) Protein*. *Cell*, 2000. **103**(4): p. 583-594.
- 346 15. Bonet-Ponce, L., et al., *LRRK2 mediates tubulation and vesicle sorting from membrane*  
347 *damaged lysosomes*. *bioRxiv*, 2020: p. 2020.01.23.917252.
- 348 16. Schink, K.O., et al., *The PtdIns3P-binding protein Phafin2 escorts macropinosomes through*  
349 *the cortical actin cytoskeleton*. 2017, *bioRxiv*.
- 350 17. Williamson, C.D. and J.G. Donaldson, *Arf6, JIP3, and dynein shape and mediate*  
351 *macropinocytosis*. *Molecular biology of the cell*, 2019. **30**(12): p. 1477-1489.
- 352 18. Ronan, B., et al., *A highly potent and selective Vps34 inhibitor alters vesicle trafficking and*  
353 *autophagy*. *Nature Chemical Biology*, 2014. **10**(12): p. 1013-1019.
- 354 19. Putyrski, M. and C. Schultz, *Protein translocation as a tool: The current rapamycin story*. *FEBS*  
355 *Letters*, 2012. **586**(15): p. 2097-2105.
- 356 20. Sato, T., et al., *JSAP1/JIP3 and JLP regulate kinesin-1-dependent axonal transport to prevent*  
357 *neuronal degeneration*. *Cell Death & Differentiation*, 2015. **22**(8): p. 1260-1274.
- 358 21. Vilela, F., et al., *Structural characterization of the RH1-LZI tandem of JIP3/4 highlights RH1*  
359 *domains as a cytoskeletal motor-binding motif*. *Scientific Reports*, 2019. **9**(1).
- 360 22. Llinas, P., et al., *Structure of a truncated form of leucine zipper II of JIP3 reveals an*  
361 *unexpected antiparallel coiled-coil arrangement*. *Acta Crystallographica Section F Structural*  
362 *Biology Communications*, 2016. **72**(3): p. 198-206.
- 363 23. Sneeggen, M., et al., *WDFY2 restrains matrix metalloproteinase secretion and cell invasion by*  
364 *controlling VAMP3-dependent recycling*. *Nature Communications*, 2019. **10**(1): p. 2850.
- 365 24. Pedersen, N.M., et al., *The PtdIns3P-Binding Protein Phafin 2 Mediates Epidermal Growth*  
366 *Factor Receptor Degradation by Promoting Endosome Fusion*. *Traffic*, 2012. **13**(11): p. 1547-  
367 1563.
- 368 25. Tang, T.-X., et al., *Structural, thermodynamic, and phosphatidylinositol 3-phosphate binding*  
369 *properties of Phafin2*. *Protein Science*, 2017. **26**(4): p. 814-823.
- 370 26. Montagnac, G., et al., *Decoupling of Activation and Effector Binding Underlies ARF6 Priming*  
371 *of Fast Endocytic Recycling*. *Current Biology*, 2011. **21**(7): p. 574-579.
- 372 27. Wassmer, T., et al., *The Retromer Coat Complex Coordinates Endosomal Sorting and Dynein-*  
373 *Mediated Transport, with Carrier Recognition by the trans-Golgi Network*. *Developmental*  
374 *Cell*, 2009. **17**(1): p. 110-122.
- 375 28. Matsui, T., N. Ohbayashi, and M. Fukuda, *The Rab Interacting Lysosomal Protein (RILP)*  
376 *Homology Domain Functions as a Novel Effector Domain for Small GTPase Rab36: Rab36*  
377 *REGULATES RETROGRADE MELANOSOME TRANSPORT IN MELANOCYTES*. 2012. **287**(34): p.  
378 28619-28631.
- 379 29. Galli, T., et al., *A Novel Tetanus Neurotoxin-insensitive Vesicle-associated Membrane Protein*  
380 *in SNARE Complexes of the Apical Plasma Membrane of Epithelial Cells*. *Molecular Biology of*  
381 *the Cell*, 1998. **9**(6): p. 1437-1448.
- 382 30. Taylor, M.J., D. Perrais, and C.J. Merrifield, *A High Precision Survey of the Molecular Dynamics*  
383 *of Mammalian Clathrin-Mediated Endocytosis*. *PLOS Biology*, 2011. **9**(3): p. e1000604.
- 384 31. Ran, F.A., et al., *Genome engineering using the CRISPR-Cas9 system*. *Nature Protocols*, 2013.  
385 **8**(11): p. 2281-2308.
- 386 32. Brückner, A., et al., *Yeast two-hybrid, a powerful tool for systems biology*. *International*  
387 *journal of molecular sciences*, 2009. **10**(6): p. 2763-2788.
- 388 33. Madeira, F., et al., *The EMBL-EBI search and sequence analysis tools APIs in 2019*. *Nucleic*  
389 *acids research*, 2019. **47**(W1): p. W636-W641.

## 391 **Materials and Methods**

### 392 **Constructs, Cells and Culture Conditions**

393 hTERT-RPE1 cells (ATCC CRL-4000) were grown in DMEM/F12 medium (Gibco) with 10% Fetal Bovine  
394 Serum, 5U/ml penicillin and 50µg/ml streptomycin. HeLa cells were grown in DMEM (Gibco) with  
395 10% Fetal Bovine Serum, 5U/ml penicillin and 50µg/ml streptomycin. Cell lines stably expressing  
396 constructs were generated by lentiviral transduction at low multiplicity of infection and subsequent  
397 antibiotic selection for integration of the expression cassette. The following antibiotics were used:  
398 Puromycin (2.5-5µg/ml), Blastidicin (10µg/ml), Geneticin (500µg/ml). VSV-G pseudotyped lentiviral  
399 particles were packaged using a third-generation lentivirus system in Lenti-X cells. All lentiviral  
400 constructs except Phafin2 were expressed from a phospho-glycerate kinase (PGK) promoter. LAP-tag  
401 fusions of Phafin2 were expressed under control of the PGK promoter, whereas other tagged Phafin2  
402 constructs were expressed from an elongation-factor-1α (EF1α) promoter. Transfections were  
403 carried out using Fugene 6 (Promega) at a ratio of 3µl reagent per µg DNA. Halotag fusion proteins  
404 were labelled with Janelia Fluor 646 Halotag Ligand (Promega) for live cell imaging, or with Janelia  
405 Fluor 549 Halotag Ligand (Promega) for correlative light and electron microscopy.

406

### 407 **Generation of JIP4 knockout cell lines**

408 The gRNA sequence (CCTGGACTCGGTGTTTCGCGC) was cloned into pX458 with GFP replaced with  
409 iRFP. The construct was nucleofected into hTERT-RPE1 cells (Lonza) and sorted by flow cytometry  
410 into single cells in a 24 well plate. The resulting colonies were assayed by Western blot and  
411 sequencing clones from a genomic PCR flanking the predicted Cas9 cleavage site. The PCR primers for  
412 the genomic PCR were CTGGAGGACGGTGTGGTGTA and CGCTCGTACTGGGTGATGAG, with a product  
413 length of 266bp, which was cloned into pJet (ThermoFisher Scientific) for Sanger sequencing. Two  
414 cell lines lacking JIP4 expression by Western Blot were obtained, and genomic PCR showed one of  
415 them to have a G and a C frameshifting insertion. The other clone only produced products with a C  
416 frameshifting insertion. The cell line with both alleles containing a confirmed frameshift was chosen  
417 for subsequent use, and further validated by immunofluorescence. Sanger sequencing  
418 chromatograms, western blot results and immunofluorescence images are shown in Supplemental  
419 Figure 1.

420

### 421 **Antibodies**

422 The following antibodies were used.

| Target  | Assay              | Concentration | Company           | Catalog No.  |
|---------|--------------------|---------------|-------------------|--------------|
| JIP4    | Western Blot       | 1:1000        | Cell Signaling    | 5519         |
| Phafin2 | Western Blot       | 1:1000        | Sigma-Aldrich     | HPA024829    |
| GFP     | Western Blot       | 1:1000        | Roche             | 11814460001  |
| GFP     | Immunofluorescence | 1:100         | Roche             | 11814460001  |
| JIP4    | Immunofluorescence | 1:100         | Cell Signaling    | 5519         |
| EEA1    | Immunofluorescence | 1:160000      | Monash University | Ban-Hock Toh |
| VPS26   | Immunofluorescence | 1:100         | Abcam             | ab23892      |
| VPS35   | Immunofluorescence | 1:100         | Abcam             | ab10099      |

423

#### 424 **Plasmids**

425 JIP4 was obtained by PCR from cDNA reverse transcribed with Superscript IV (Life Technologies)  
426 prepared from RPE1 cells. Various constructs of JIP3 were cloned from pEGFP-JIP3, a gift from  
427 Philippe Chavrier. VAMP3 was cloned from pEGFP-VAMP3 (Addgene 42310), which was a gift from  
428 Thierry Galli [29]. Coronin1B-mCherry (Addgene 27694) and Dynamin2-mCherry (Addgene 27689)  
429 were gifts from Christien Merrifield [30]. pX458 (Addgene 48138) was a gift from Feng Zhang [31].  
430 Other constructs were cloned using standard molecular biology techniques.

431

#### 432 **Immunoprecipitation**

433 hTERT-RPE1 cells stably expressing GFP or GFP-JIP4 were grown in 6cm dishes up to 80% confluence,  
434 washed once with PBS and lysed in lysis buffer (25mM HEPES pH 7.5, 100mM NaCl, 1mM DTT, 0.5%  
435 IGEPAL, 1x cOmplete protease inhibitor (Roche), 1x phosphatase inhibitor 2 (Merck) and 1x  
436 phosphatase inhibitor 3 (Merck). Cell debris was removed by pelleting at 5000g for 10mins. GFP-Trap  
437 beads were added and gently mixed for 2 hours at 4°C. Beads and supernatant were magnetically  
438 separated and beads were washed four times with lysis buffer before final denaturation with 1x  
439 Laemmli Buffer at 100°C for 20mins.

440 For tandem affinity purifications, hTERT-RPE1 cells stably expressing LAP or LAP-Phafin2 were grown  
441 in 15cm dishes up to 80% confluency. Cells were stimulated with Hepatocyte Growth Factor (HGF)  
442 (Merck) at 50ng/ml for 10mins before the experiment. Cells were lysed in lysis buffer (50 mM HEPES  
443 pH7.5, 0.1 % NP40, 150 mM KCl, 1 mM EGTA, 1mM MgCl<sub>2</sub>, 1 mM DTT, 15 % Glycerol), cleared by  
444 centrifugation at 20,000g for 20 mins, and incubated with GFP-Trap beads for 2 hours. Following 4  
445 washes in lysis buffer, the GFP-Trap bead bound fraction was incubated with recombinant TEV  
446 (Merck) overnight at 4°C. The supernatant fraction was collected and incubated with S-protein beads

447 (Merck) for 2 hours. Bound fractions were washed 4 times in lysis buffer and processed for mass  
448 spectrometry analysis.

449 For APEX2 proximity labeling proteomics, hTERT-RPE1 cells stably expressing APEX2-mCitrine-Phafin2  
450 fusions or control fusions were grown in 15cm dishes to 80% confluency. Cells were incubated for 3  
451 hours in 500  $\mu$ M Biotin-Phenol (Iris) at 37°C, washed in PBS and incubated for 2 min in 2 mM H<sub>2</sub>O<sub>2</sub>  
452 (Merck) at room temperature, and subsequently washed 4 times in Quencher solution (5 mM Trolox  
453 (Merck), 10 mM Na-Ascorbate (Merck)). Cells were lysed on ice in RIPA buffer (50mM Tris HCl  
454 (pH7.5), 150mM NaCl, 1% Triton X-100, 0.1% SDS, 0.5% NaDOC, 5mM EDTA, 1mM DTT)  
455 supplemented with protease inhibitors and 10 mM Na-Ascorbate, cleared by centrifugation at  
456 20,000g for 20 min, and passed through desalting columns to deplete free biotin-phenol. Lysates  
457 were subsequently incubated for 2 hours at 4°C with Streptavidin Dynabeads (Invitrogen M-280), and  
458 beads were successively washed with RIPA (2 times), PBST (2 times), 1% SDS (2 times), 4 M Urea (2  
459 times), and PBS (5 times) before being processed for mass spectrometry analysis.

460

#### 461 **LC-MS/MS, protein identification, and label-free quantitation**

462 Beads containing bound proteins were washed 3 times with PBS, reduced with 10mM DTT for 1h  
463 at 56°C followed by alkylation with 30mM iodoacetamide in final volume of 100 $\mu$ l for 1h at  
464 room temperature. The samples were digested over night with Sequencing Grade Trypsin (Promega)  
465 at 37°C, using 1.8 $\mu$ g trypsin. Reaction was quenched by adding 1% trifluoroacetic acid to the  
466 mixture. Peptides were cleaned for mass spectrometry by STAGE-TIP method using a C18 resin disk  
467 (3M Empore)<sup>49</sup>. All experiments were performed on a Dionex Ultimate 3000 nano-liquid  
468 chromatography (LC) system (Sunnyvale CA, USA) connected to a quadrupole—Orbitrap (QExactive)  
469 mass spectrometer (ThermoElectron, Bremen, Germany) equipped with a nanoelectrospray ion  
470 source (Proxeon/Thermo). For liquid chromatography separation we used an Acclaim PepMap 100  
471 column (C18, 2 $\mu$ m beads, 100 $\mu$ m, 75 $\mu$ m inner diameter) (Dionex, Sunnyvale CA, USA) capillary of  
472 25cm bed length. The flow rate used was 0.3 $\mu$ L/min, and the solvent gradient was 5% B to 40% B  
473 in 120min, then 40–80% B in 20min Solvent A was aqueous 2% acetonitrile in 0.1% formic acid,  
474 whereas solvent B was aqueous 90% acetonitrile in 0.1% formic acid.

475

476 The mass spectrometer was operated in the data-dependent mode to automatically switch between  
477 mass spectrometry (MS) and MS/MS acquisition. Survey full scan MS spectra (from m/z 300 to 1750)  
478 were acquired in the Orbitrap with resolution R=70,000 at m/z 200 (after accumulation to a target  
479 of 1,000,000 ions in the quadrupole). The method used allowed sequential isolation of the most  
480 intense multiply charged ions, up to ten, depending on signal intensity, for fragmentation on the

481 higher-energy C-trap dissociation (HCD) cell using high-energy collision dissociation at a target value  
482 of 100,000 charges or maximum acquisition time of 100ms. MS/MS scans were collected at 17,500  
483 resolution at the Orbitrap cell. Target ions already selected for MS/MS were dynamically excluded for  
484 45s. General mass spectrometry conditions were: electrospray voltage, 2.0kV; no sheath and  
485 auxiliary gas flow, heated capillary temperature of 250°C, heated column at 35°C, normalized HCD  
486 collision energy 25%. Ion selection threshold was set to 1e-5 counts. Isolation width of 3.0Da was  
487 used.

488

489 MS raw files were submitted to MaxQuant software version 1.6.1.0 for protein identification<sup>50</sup>.  
490 Parameters were set as follow: protein N-acetylation, methionine oxidation and pyroglutamate  
491 conversion of Glu and Gln as variable modifications. First search error window of 20ppm and main  
492 search error of 6ppm. Trypsin without proline restriction enzyme option was used, with two  
493 allowed miscleavages. Minimal unique peptides were set to 1, and false-discovery rate (FDR) allowed  
494 was 0.01 (1%) for peptide and protein identification. Label-free quantitation was set with a retention  
495 time alignment window of 3min The Uniprot human database was used (downloaded august 2013).  
496 Generation of reversed sequences was selected to assign FDR rates.

497

#### 498 **Yeast two-hybrid and $\beta$ -galactosidase assays**

499 Yeast two-hybrid assays were carried out in the yeast strain L40 (ATCC MYA-3332), using LexA and  
500 Gal4-Activation Domain (GAD) as paired bait and prey N-terminal fusions [32]. The constructs were  
501 co-transformed into yeast and double positive transfectants were selected using leucine +  
502 tryptophan drop-out agar medium. Several clones were picked of each condition and pooled to grow  
503 overnight liquid cultures for  $\beta$ -galactosidase assay. Liquid  $\beta$ -galactosidase assays were carried out by  
504 lysing yeast cells with lysis buffer (100mM Tris HCl pH 7.5, 0.05% Triton-X100) and snap freeze/thaw.  
505  $\beta$ -galactosidase activity was assayed by hydrolysis of ortho-nitrophenyl- $\beta$ -galactoside to ortho-  
506 nitrophenol in reaction buffer (100mM sodium phosphate buffer pH 7.0, 10mM KCl, 1mM MgSO<sub>4</sub>) at  
507 37°C. The reaction was stopped by addition of a sodium carbonate buffer (250mM final  
508 concentration) and immersion in ice as soon as a yellow colour was seen. Ortho-nitrophenol product  
509 was quantitated by absorbance at 420nm, reaction rate was calculated, and normalized against  
510 quantity of yeast cells (absorbance at 600nm of raw lysate). All experiments were assayed in  
511 technical duplicates and 3 separate experiments were carried out for each datapoint reported.

512

#### 513 **Immunocytochemistry**

514 hTERT-RPE1 cells of the indicated genotype were grown on glass coverslips. The cells were washed  
515 once with ice-cold phosphate buffered saline (PBS) and pre-permeabilized for 5min with PEM buffer  
516 (80mM PIPES pH 6.8, 5mM EGTA, 1mM MgCl<sub>2</sub>) containing 0.05% saponin on ice. The cells were then  
517 fixed for 20mins on ice with 4% paraformaldehyde in PBS and stained with primary antibody at the  
518 listed concentration overnight at 4°C in PBS containing 0.05% saponin. Secondary antibody staining  
519 was carried out for 1hr at room temperature in PBS containing 0.05% saponin. Samples were  
520 mounted in Mowiol for normal immunofluorescence, and in ProLong Diamond (ThermoFisher  
521 Scientific) for Structured Illumination Microscopy.

522

### 523 Live Cell Microscopy

524 Live-cell imaging was performed on a Deltavision OMX V4 microscope equipped with three PCO.edge  
525 sCMOS cameras, a solid-state light source and a laser-based autofocus. Cells were imaged in Live Cell  
526 Imaging buffer (Invitrogen) supplemented with 20mM glucose. Environmental control was provided  
527 by a heated stage and an objective heater (20–20 Technologies). Images were deconvolved using  
528 softWoRx software and processed in ImageJ/Fiji.

529

### 530 Structured illumination microscopy

531 hTERT-RPE1 cells stably expressing Phafin2-GFP were fixed and processed as specified for  
532 immunocytochemistry. Phalloidin-Alexa Fluor 647 was included in primary and secondary antibody  
533 incubations to stain F-actin, anti-GFP and anti-JIP4 was used to stain Phafin2-GFP and endogenous  
534 JIP4. Three-dimensional SIM imaging was performed on Deltavision OMX V4 microscope with an  
535 Olympus x60 NA 1.42 objective and three PCO.edge sCMOS cameras and 488nm, 568nm and 647nm  
536 laser lines. Cells were illuminated with a grid pattern and for each image plane, 15 raw images (5  
537 phases and 3 rotations) were acquired. Super-resolution images were reconstructed from the raw  
538 image files aligned and projected using Softworx software (Applied Precision, GE Healthcare). Images  
539 were processed in ImageJ/Fiji.

540

### 541 Quantifying endogenous JIP4 on Early Macropinosomes

542 Cells of the listed genotype were processed and fixed for immunocytochemistry. 15 fields of view of  
543 each condition were acquired (typically 1-3 cells per field of view) without changing acquisition  
544 parameters. EEA1 positive structures of at least 5 pixels were segmented from each image and the



545 mean pixel intensity of each structure in the JIP4 channel was obtained. Each dataset was normalized  
546 by the mean of the entire experiment to control for staining and acquisition variation.

547

#### 548 **Quantifying JIP4 association to tubules**

549 Cells of the listed genotype stably expressing the 2xFYVE<sup>WDFY2</sup> probe and mNeonGreen-JIP4 were  
550 stimulated with 50ng/ml HGF to trigger macropinocytosis, imaged live and videos were taken for  
551 5mins at intervals of 3secs. Tubules (membrane deformations that exceeded 6 pixels in length,  
552 80nm/pixel) that formed during that time period were marked in the 2xFYVE<sup>WDFY2</sup> channel. The  
553 cytoplasmic background fluorescence for JIP4 of each cell was estimated by taking a 100x100 pixel  
554 square and measuring the mean fluorescence in the JIP4 channel. Each identified tubule was  
555 classified as JIP4 positive if it contained JIP4 fluorescence at least 50% over the background  
556 fluorescence determined above. Each cell was treated as a single biological datapoint (proportion of  
557 tubules JIP4 positive).

558

#### 559 **Quantification of Co-efficient of Variation**

560 RPE1 or RPE1 JIP4 KO cells expressing Phafin2-mTurquoise were transfected one day before the  
561 experiment with either empty vector or mNeonGreen-JIP4. Cells were stimulated with HGF (50ng/ml)  
562 and timelapse images were captured. The image frame corresponding to 30 secs after the start of  
563 imaging was extracted and used for further analysis. All macropinosomes greater than 1 $\mu$ m in  
564 diameter were included in the analysis. A 3-pixel wide line was manually drawn in ImageJ around  
565 each macropinosome such that the entire circumference of the macropinosome was included.  
566 ImageJ reports the average gray value of the 3-pixel thickness at each position along the line. These  
567 values were used to compute the co-efficient of variation of Phafin2 intensity along the  
568 circumference of each macropinosome.

569

#### 570 **Measurement of protein fluorescence intensities at the macropinosome membrane**

571 Live cell imaging was performed as described earlier on RPE1 cells expressing the specified proteins.  
572 HGF (50ng/ml) was used to trigger macropinocytosis and timelapse videos were captured. Newly  
573 formed macropinosomes were identified in timelapse movies and manually tracked by using Phafin2  
574 or membrane markers as reference. For each time point, a region of their limiting membrane was  
575 marked as region of interest. Fluorescence intensity of a circular ROI (10 pixel diameter) surrounding

576 the marked region was quantified in all image channels and measurements were exported for further  
577 analysis.

578

### 579 **Flow Cytometry – Dextran Uptake**

580 Cells were seeded in 6 well plates at a density of  $1 \times 10^5$  the day before the experiment. The media  
581 was replaced by prewarmed media containing 0.5mg/ml dextran-Alexa Fluor 488 (10kDa) and  
582 50ng/ml HGF (and EIPA where indicated) and cells were incubated at 37°C for 30mins. After the  
583 incubation, cells were washed five times with prewarmed media, trypsinized, and placed on ice after  
584 neutralization of trypsin. Flow cytometry was performed shortly after trypsinization with an LSRII  
585 flow cytometer (BD Biosciences).

586

### 587 **Dextran Fluorescence by Microscopy**

588 Cells of the indicated genotypes were seeded in glass-bottomed mattek dishes. The media was  
589 replaced by prewarmed media containing 0.5mg/ml dextran-Alexa Fluor 488 (10kDa) and 50ng/ml  
590 HGF. Cells were incubated at 37°C for 30mins. After the incubation, cells were quickly washed four  
591 times with prewarmed media, once with phosphate buffered saline, and fixed for 10min at room  
592 temperature using 4% paraformaldehyde in PBS. The cells were gently washed three times in PBS  
593 and the plasma membrane labelled with Wheat Germ Agglutinin-Alexa Fluor 647 (Molecular Probes)  
594 at 5 $\mu$ g/ml for 10mins in PBS. The cells were washed twice, the nuclei labeled with Hoescht 33342  
595 (Molecular Probes), and imaged in PBS. Image z-stacks of 6 $\mu$ m were acquired at an interval of 250nm  
596 and deconvolved. One cell was measured per field of view acquired (the field of view was typically  
597 only large enough to fully fit one cell). For whole cell dextran fluorescence measurements, image  
598 stacks were z-projected using the sum of intensities. Cell outlines were manually traced in ImageJ  
599 using the plasma membrane marker as a guide. Background values (compensation for residual  
600 nonspecific dextran and imperfect deconvolution) were obtained from a 100x100 pixel square  
601 outside cells and subtracted from the fluorescence measured inside the cells. For organelle specific  
602 values, the image plane that was most in focus was extracted from the stack. Organelles of at least 5  
603 pixels (approximately diffraction limit of 240nm) were segmented using the listed organelle marker  
604 and the fluorescence measured. Values reported are computed per cell. Each experiment was  
605 normalized by the average of all datapoints in that experiment to account for acquisition parameters  
606 (these were held constant for all image stacks acquired in an experiment).

607

## 608 **Correlative Light and Electron Microscopy**

609 Cells were seeded on gridded Matteks the day before the experiment. Light microscopy was carried  
610 out as specified in “Live Cell Microscopy” with timelapse acquisition while cells were stimulated with  
611 50 ng/ml HGF. Directly after live cell imaging fixation was carried out using a final concentration of  
612 2% glutaraldehyde in 0.1 M PHEM buffer (80 mM PIPES, 25 mM HEPES, 2 mM MgCl<sub>2</sub>, 10 mM EGTA,  
613 pH 6.9) for 1 h and postfixation was done in 1% OsO<sub>4</sub> and 1.5% KFeCN in the same buffer (1 h).  
614 Samples were further en bloc stained with 4% aqueous uranyl acetate for 1 h, dehydrated in graded  
615 ethanol series and embedded with Epon-filled BEEM capsules (EMS; Polysciences, Inc., 00224) placed  
616 on top of the Mattek dish. After polymerization blocks were trimmed down to the regions previously  
617 identified on the OMX microscope and now imprinted on the Epon block. 200 nm sections were cut  
618 on an Ultracut UCT ultramicrotome (Leica, Germany) and collected on formvar coated slot grids.  
619 Samples were imaged using a Thermo Scientific™ Talos™ F200C microscope equipped with a Ceta  
620 16M camera. Single-axes tilt-series for tomography were acquire between -60° and 60° tilt angles  
621 with 2° increment. Tomograms were computed in IMOD using weighted back projection [Kremer et  
622 al., 1996, PMID:8742726]. 3D modeling was performed by manual tracing of the macropinosome  
623 membrane in IMOD software version 4.9.3. Display of tomogram slices was also performed using  
624 IMOD software.

625

## 626 **Rapamycin Recruitment**

627 The mitochondrial anchor was constructed by fusing tandem FKBP12 FK506 binding domains to an N-  
628 terminal Tom70-derived mitochondrial targeting signal, with mTagBFP2 as localization marker. The  
629 FKBP-Rapamycin-Binding (FRB) domain of mTOR with a T2098L stabilization mutation and  
630 mNeonGreen was appended to Phafin2 at the C-terminus of Phafin2. The mCherry tagged JIP4 was  
631 not further modified. These three constructs were transfected into RPE1 cells as previously described  
632 and images acquired in live timelapse microscopy. A final working concentration of 10µM of SAR-405  
633 was used to dissociate Phafin2 from vesicles, and a final working concentration of 250nM of  
634 rapamycin was used to recruit tagged Phafin2 to the mitochondrial anchor, added 5mins after  
635 treatment with SAR-405. Images were acquired before treatment, 5mins after treatment with SAR-  
636 405 and approximately 30mins after treatment with rapamycin. Intensity measurements were  
637 obtained by segmenting images using the mTagBFP2 mitochondrial marker.

638

## 639 **Statistical Analysis**

640 Statistical analysis was carried out in Graphpad Prism (Graphpad Software). Student's t-test was used  
641 to compare two groups. ANOVA was used to compare multiple groups and Holm-Sidak was used to  
642 correct for multiple comparisons. The threshold for significance was set at  $p=0.05$ . All comparisons  
643 made are reported regardless of significance. In all figures, \* indicates that  $p<0.05$ , \*\* indicates that  
644  $p<0.01$ , and \*\*\* indicates that  $p<0.001$ .

645

646 **Figure Legends**

647 **Figure 1: JIP4 interacts and colocalizes with Phafin2.** A) Domain structure of JIP4 and  
648 Phafin2, dotted lines indicate interacting regions. CC1, 2 and 3 indicate predicted coiled coils.  
649 B)  $\beta$ -galactosidase activity derived from yeast two-hybrid assay expressing the specified  
650 constructs, with JIP4 (566-767aa) as prey. C) Biotinylated JIP4 detected in mass spectrometry  
651 following labeling with the specified APEX2 fusion constructs, normalized to wildtype  
652 Phafin2. Cytosol is a control consisting only of the soluble APEX2, while Membrane is a  
653 control consisting of the APEX2 fused to a signal peptide that targets it primarily to the  
654 plasma membrane. D)  $\beta$ -galactosidase activity derived from yeast 2-hybrid assay expressing  
655 the specified constructs, with full length Phafin2 as bait. E) Endogenous JIP4 detected in  
656 mass spectrometry following affinity purification of tagged Phafin2, fold change over control  
657 cells expressing only the affinity tag. F) Immunoprecipitation of GFP-JIP4 with GFP-Trap,  
658 western blotting against endogenous Phafin2 in RPE1 lysate. Uncropped blot in Suppl. Fig 1.  
659 Representative of 3 independent experiments. G) RPE1 cell expressing Phafin2-GFP and  
660 mCherry-JIP4, imaged live. Montage gallery of boxed region. H) Mean fluorescence  
661 measurements along the limiting membrane of macropinosomes, each measurement  
662 normalized to the mean of the individual time series, aligned at timepoint 15sec to the burst  
663 of Phafin2 fluorescence on nascent macropinosomes, +/-SEM (n=13 macropinosomes). I)  
664 RPE1 cell expressing Phafin2-GFP and mCherry-JIP4, treated with SAR405 (VPS34 inhibitor)  
665 to remove PtdIns3P from macropinosomes, imaged live. Montage gallery of boxed region. J)  
666 Mean fluorescence measurements along the limiting membrane of macropinosomes treated  
667 as in I, each measurement normalized to the mean of the individual time series +/-SEM (n=4  
668 macropinosomes). Scale bars in (G) and (I) are 10 $\mu$ m.

669

670 **Figure 2: Membrane recruitment of JIP4 by Phafin2.** A) Representative images of RPE1 cells  
671 of the specified genotypes, fixed and immunostained against JIP4 and EEA1. Brightness  
672 settings are equal across all images and magnifications. Scale bar is 10  $\mu$ m. B) Mean  
673 intensities of JIP4 immunostaining inside EEA1 positive vesicles, each experiment normalized  
674 against mean of all datapoints in that experiment. Mean of 3 experiments shown, +/- s.e.m.  
675 (3530-6121 vesicles per condition per experiment) C) RPE1 cell expressing Phafin2-FRB-  
676 mNeonGreen, mCherry-JIP4, and a mitochondrial-anchored 2xFKBP. Shown are images of

677 the same cell before addition of 10 $\mu$ M SAR405, after SAR405 has removed macropinosome  
678 PtdIns3P, and after 250nM rapamycin has recruited Phafin2 to the mitochondrial  
679 membrane. Scale bar is 10 $\mu$ m. D) JIP4 fluorescence at the mitochondria, images acquired of  
680 the same cells under the three sequential conditions, segmented and measured using the  
681 mitochondrial marker as shown in C). Error bars are 95% C.I. (n=6 cells)

682

683 **Figure 3: JIP4 and Phafin2 interaction is not shared with their respective isoforms. A)**

684 Dotplot of human JIP3 against human JIP4. Similarity matching using BLOSUM62 with a  
685 sliding window of 5 residues and a threshold score of 20 [33]. Note the unevenly distributed  
686 regions of high sequence conservation. B) Sequence alignment of the Phafin2 and Phafin1  
687 PH domain. C)  $\beta$ -galactosidase activity derived from yeast 2-hybrid assay expressing the  
688 specified constructs. Representative of 3 independent experiments. D)  $\beta$ -galactosidase  
689 activity derived from yeast 2-hybrid assay expressing the specified constructs.  
690 Representative of 3 independent experiments. E) Representative images of cells of the  
691 indicated genotypes expressing mNeonGreen JIP3 and a Phafin isoform. JIP3 is not recruited  
692 to macropinosomes. Scale bars are 10 $\mu$ m. F) Representative JIP4 KO cell expressing  
693 mNeonGreen-JIP4 and a Phafin isoform. Phafin1 does not recruit JIP4.

694

695 **Figure 4: JIP4 is recruited to macropinosome tubules by Phafin2. A)** Representative image

696 of RPE1 cell expressing mNeonGreen-JIP4 and mCherry-Rab5, imaged live. B) Montage  
697 gallery of a macropinosome as it matures into a Rab5 positive early macropinosome and  
698 acquires JIP4. C) Representative images and magnifications of RPE1 cells of the specified  
699 genotype expressing mNeonGreen-Jip4 and mCherry-2xFYVE(WDFY2). Line plots are taken  
700 along the indicated line from left to right. Scale bar is 10  $\mu$ m. D) Fraction of 2xFYVE(WDFY2)  
701 tubules per cell positive for mNG-JIP4. Positive threshold set at 1.5x cytoplasmic  
702 fluorescence. Mean of 3 experiments +/- s.e.m. shown. (42-105 events per condition per  
703 experiment) E) Representative image of an RPE1 cell expressing mNeonGreen-JIP4 and  
704 weakly expressing Phafin2-Halotag. Note that both Phafin2 and JIP4 stand out strongly  
705 against the diffuse cytoplasmic fluorescence on tubules. Scale bar is 5 $\mu$ m.

706

707

708 **Figure 5: JIP4 tubules are extruded and continuous with macropinosomes.** A) Image of  
709 RPE1 cell expressing mNeonGreen-JIP4 and Halo-2xFYVE(WDFY2), imaged live during  
710 preparation of the CLEM specimen. Scale bar is 5 $\mu$ m. B) Timelapse montage of the tubulating  
711 macropinosome until glutaraldehyde fixation. C) Electron micrograph of the macropinosome  
712 depicted in (A) and (B). Black dots are gold fiducials for electron tomography. The longest  
713 tubule emanating from the JIP4 concentration is marked with a black arrowhead. Scale bar is  
714 500nm. D) Model reconstructed from electron tomograph of the macropinosome depicted  
715 in (C). The limiting membrane of the macropinosome is in magenta, two separate emanating  
716 tubules are in green and blue. The green tubule corresponds to the tubule indicated in (C).

717

718 **Figure 6: JIP4 tubules bear markers of membrane recycling zones.** A) Structured  
719 illumination microscopy (SIM) images from two cells expressing Phafin2-GFP, fixed,  
720 immunostained against JIP4 and stained for F-actin with phalloidin. Scale bar is 1 $\mu$ m. B)  
721 Representative image of RPE1 cell expressing mNeonGreen-JIP4 and Coronin1B-mCherry.  
722 Line profile taken along the indicated line from left to right. C) Representative image of RPE1  
723 cell expressing mNeonGreen-JIP4 and Dynamin2-mCherry. Line profile taken along the  
724 indicated line from left to right. D) Representative image of RPE1 cell expressing  
725 mNeonGreen-JIP4, fixed and immunostained for VPS26. Line profile taken along the  
726 indicated line from top to bottom. E) Representative image of RPE1 cell expressing  
727 mNeonGreen-JIP4, fixed and immunostained for VPS35. Line profile taken along the  
728 indicated line from top to bottom. F) Representative image of RPE1 cell expressing  
729 mNeonGreen-JIP4 and VAMP3-mCherry. Line profile taken along the indicated line from left  
730 to right. Scale bars in B, C, D, E, and F are 5 $\mu$ m.

731

732 **Figure 7: JIP4 promotes tubulation from macropinosomes.** A) Representative images of  
733 RPE1 cells of the indicated genotypes expressing the specified constructs. The Phafin2  
734 channel is shown. Scale bar is 5 $\mu$ m. B) Example macropinosome, in the Phafin2 channel,  
735 depicting the measurement of Phafin2 fluorescence intensity along the limiting membrane  
736 of the macropinosome in red dashed line. White arrowheads indicate Phafin2 accumulation  
737 at tubule nucleating spots. Note the tubule beginning to extend from the nucleating spot on

738 the top right. C) Line profile of Phafin2 fluorescence intensity taken along the line marked in  
739 (B). Black arrowheads correspond to the Phafin2 accumulations in (B). Black dotted line  
740 indicates mean of lineplot. D) Coefficient of variation of Phafin2 fluorescence intensity along  
741 lineplots taken around macropinosomes  $>1\mu\text{m}$  in diameter as in (B), of the indicated  
742 genotypes. Mean of 6 experiments shown  $\pm$  95% C.I. (21-72 macropinosomes per condition  
743 per experiment) E) Timelapse images of RPE1 cells of the indicated genotypes expressing  
744 mNeonGreen-2xFYVE as a PtdIns3P marker and Myrpalm-mCherry as a plasma membrane  
745 marker. The yellow arrowheads indicate a macropinosome that fails to mature to an early  
746 macropinosome and re-fuses with the plasma membrane. The white arrowheads indicate a  
747 macropinosome that matures to an early macropinosome and acquires 2xFYVE. F) Fraction  
748 of macropinosomes per cell that successfully mature into an early macropinosome. Mean of  
749 3 experiments shown. Error bars are 95% C.I. (10-15 cells per genotype per experiment) G)  
750 Median fluorescence of 20000 cells of the indicated genotype/treatment after 30min uptake  
751 of fluorescent 10kDa dextran, measured by flow cytometry. Mean of 4 experiments shown  
752  $\pm$  95% C.I. H) Representative images of RPE1 cells of the indicated genotype after 30min  
753 uptake of fluorescent dextran. A plasma membrane marker (fluorescent Wheat Germ  
754 Agglutinin) is shown in magenta. I) Total dextran fluorescence per cell of the indicated  
755 genotypes after a 30min uptake of fluorescent dextran. Mean of 3 experiments shown  $\pm$   
756 95% C.I. (15-20 cells per genotype per experiment)

757

758 **Figure 8: Increased dextran retention in JIP4 KO cells.** A) Representative images of RPE1  
759 cells of the indicated genotypes expressing mCherry-Rab5 after a 30min uptake of  
760 fluorescent dextran. Scale bar is  $5\mu\text{m}$ . B) Dextran fluorescence in Rab5 positive  
761 compartments per cell of the indicated genotype after 30min uptake of fluorescent dextran.  
762 Mean of 3 experiments shown  $\pm$  95% C.I. (15-20 cells per genotype per experiment) C)  
763 Representative images of RPE1 cells of the indicated genotypes expressing mCherry-LAMP1  
764 after a 30min uptake of fluorescent dextran. Scale bar is  $5\mu\text{m}$ . B) Dextran fluorescence in  
765 LAMP1 positive compartments per cell of the indicated genotype after 30min uptake of  
766 fluorescent dextran. Mean of 3 experiments shown  $\pm$  95% C.I. (15-20 cells per genotype  
767 per experiment)

768



769

770

771 **Supplemental Figure 1: Generation and verification of RPE1 JIP4 knockout cell line. A)**

772 Guide RNA for CRISPR/Cas9 knockout. The predicted cut site is indicated. Sanger sequencing  
773 chromatograms show different frameshift insertions for both alleles. No wildtype  
774 sequencing results were recovered from the JIP4 KO cell line. B) Immunofluorescence using  
775 anti-JIP4. Images were acquired at the same settings and presented with equal brightness  
776 scaling. C) Western blot using anti-JIP4 on cell lysate from wildtype, JIP4 KO, and JIP4 KO  
777 expressing GFP-JIP4.

778

779 **Supplementary Video 1: JIP4 localizes to Phafin2 positive early macropinosomes.** Shown is

780 a macropinocytosing RPE1 cell with Phafin2-mTurquoise2 (pseudocolored green) and  
781 mNeonGreen-JIP4 (pseudocolored magenta). Note that the nascent macropinosomes  
782 entering on the right display a burst of Phafin2 that is not accompanied by JIP4, while the  
783 early macropinosomes acquire both Phafin2 and JIP4.

784

785 **Supplementary Video 2: JIP4 localizes in subdomains on Rab5 positive macropinosomes.**

786 Shown is a macropinocytosing RPE1 cell with mNeonGreen-JIP4 (pseudocolored green) and  
787 mCherry-Rab5 (pseudocolored magenta). JIP4 localizes to dynamic subdomains as the  
788 macropinosome acquires Rab5.

789

# Figure 1

A

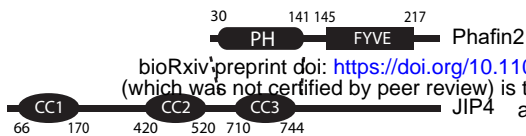

B

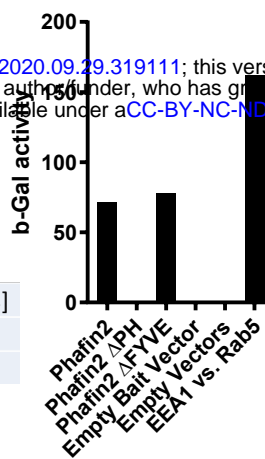

C

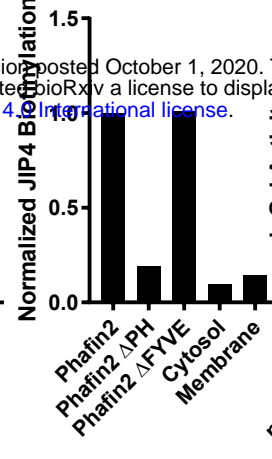

D

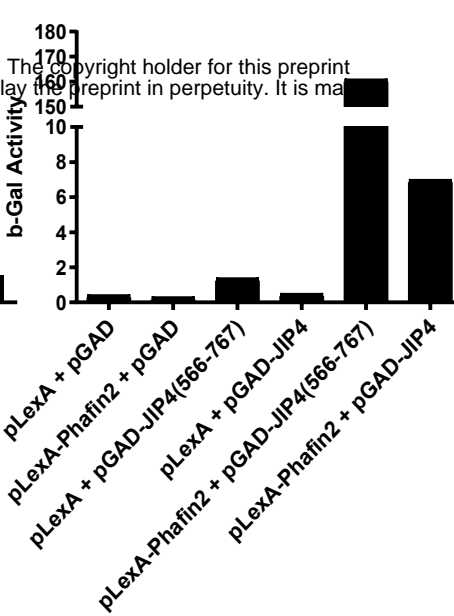

E

|         | Enrichment | Unique Peptides | Coverage [%] |
|---------|------------|-----------------|--------------|
| Phafin2 | 67538      | 20              | 71.9         |
| JIP4    | 28         | 22              | 24.1         |

F

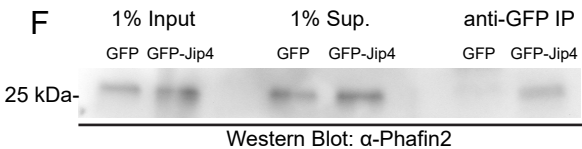

G

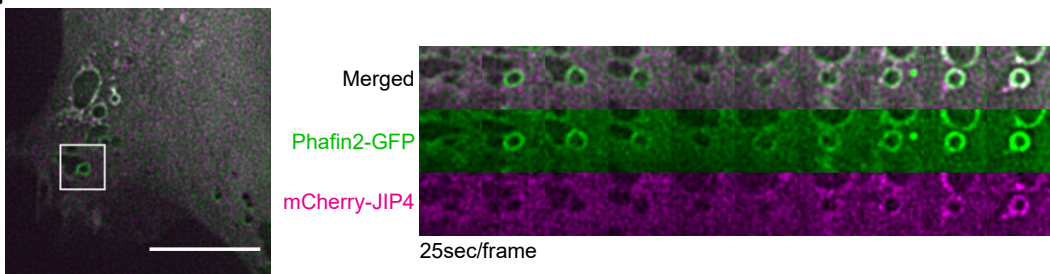

H

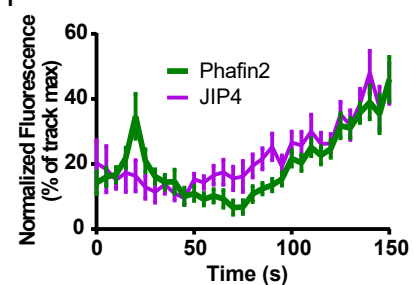

I

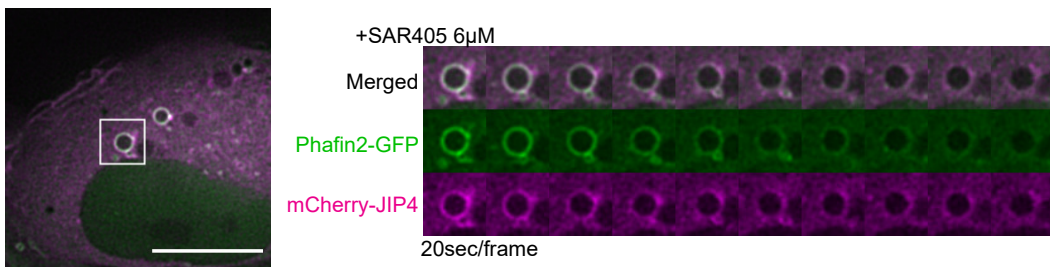

J

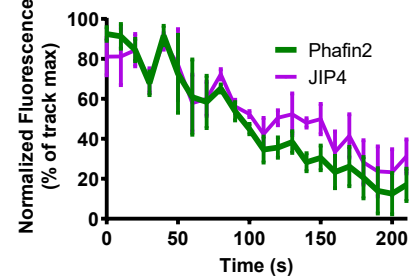

**Figure 1: JIP4 interacts and colocalizes with Phafin2.** A) Domain structure of JIP4 and Phafin2, dotted lines indicate interacting regions. CC1, 2 and 3 indicate predicted coiled coils. B)  $\beta$ -galactosidase activity derived from yeast two-hybrid assay expressing the specified constructs, with JIP4 (566-767aa) as prey. C) Biotinylated JIP4 detected in mass spectrometry following labeling with the specified APEX2 fusion constructs, normalized to wildtype Phafin2. Cytosol is a control consisting only of the soluble APEX2, while Membrane is a control consisting of the APEX2 fused to a signal peptide that targets it primarily to the plasma membrane. D)  $\beta$ -galactosidase activity derived from yeast 2-hybrid assay expressing the specified constructs, with full length Phafin2 as bait. E) Endogenous JIP4 detected in mass spectrometry following affinity purification of tagged Phafin2, fold change over control cells expressing only the affinity tag. F) Immunoprecipitation of GFP-JIP4 with GFP-Trap, western blotting against endogenous Phafin2 in RPE1 lysate. Uncropped blot in Suppl. Fig 1. Representative of 3 independent experiments. G) RPE1 cell expressing Phafin2-GFP and mCherry-JIP4, imaged live. Montage gallery of boxed region. H) Mean fluorescence measurements along the limiting membrane of macropinosomes, each measurement normalized to the mean of the individual time series, aligned at timepoint 15sec to the burst of Phafin2 fluorescence on nascent macropinosomes,  $\pm$ -SEM (n=13 macropinosomes). I) RPE1 cell expressing Phafin2-GFP and mCherry-JIP4, treated with SAR405 (VPS34 inhibitor) to remove PtdIns3P from macropinosomes, imaged live. Montage gallery of boxed region. J) Mean fluorescence measurements along the limiting membrane of macropinosomes treated as in I, each measurement normalized to the mean of the individual time series  $\pm$ -SEM (n=4 macropinosomes). Scale bars in (G) and (I) are 10 $\mu$ m.

**Figure 2**

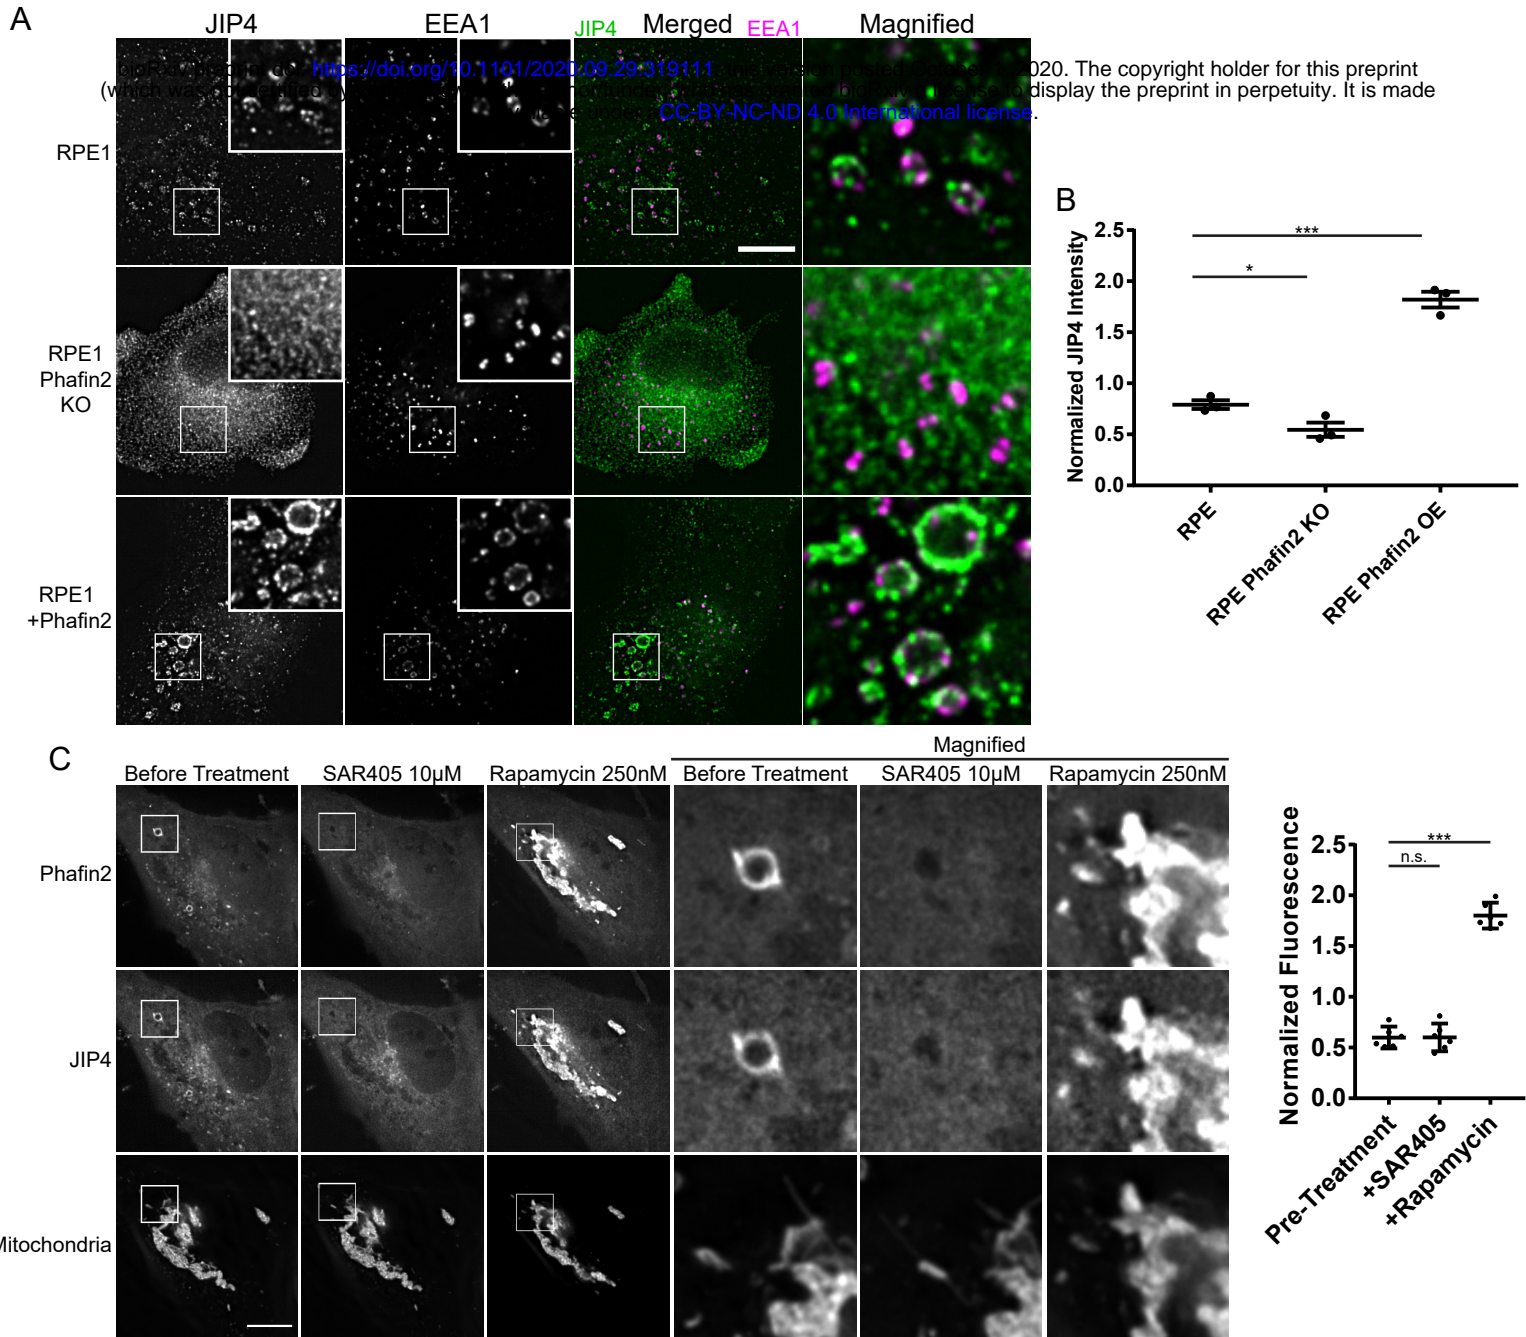

**Figure 2: Membrane recruitment of JIP4 by Phafin2.** A) Representative images of RPE1 cells of the specified genotypes, fixed and immunostained against JIP4 and EEA1. Brightness settings are equal across all images and magnifications. Scale bar is 10  $\mu$ m. B) Mean intensities of JIP4 immunostaining inside EEA1 positive vesicles, each experiment normalized against mean of all datapoints in that experiment. Mean of 3 experiments shown, +/- s.e.m. (3530-6121 vesicles per condition per experiment) C) RPE1 cell expressing Phafin2-FRB-mNeonGreen, mCherry-JIP4, and a mitochondrial-anchored 2xFKBP. Shown are images of the same cell before addition of 10 $\mu$ M SAR405, after SAR405 has removed macropinosome PtdIns3P, and after 250nM rapamycin has recruited Phafin2 to the mitochondrial membrane. Scale bar is 10 $\mu$ m. D) JIP4 fluorescence at the mitochondria, images acquired of the same cells under the three sequential conditions, segmented and measured using the mitochondrial marker as shown in C). Error bars are 95% C.I. (n=6 cells)

Figure 3

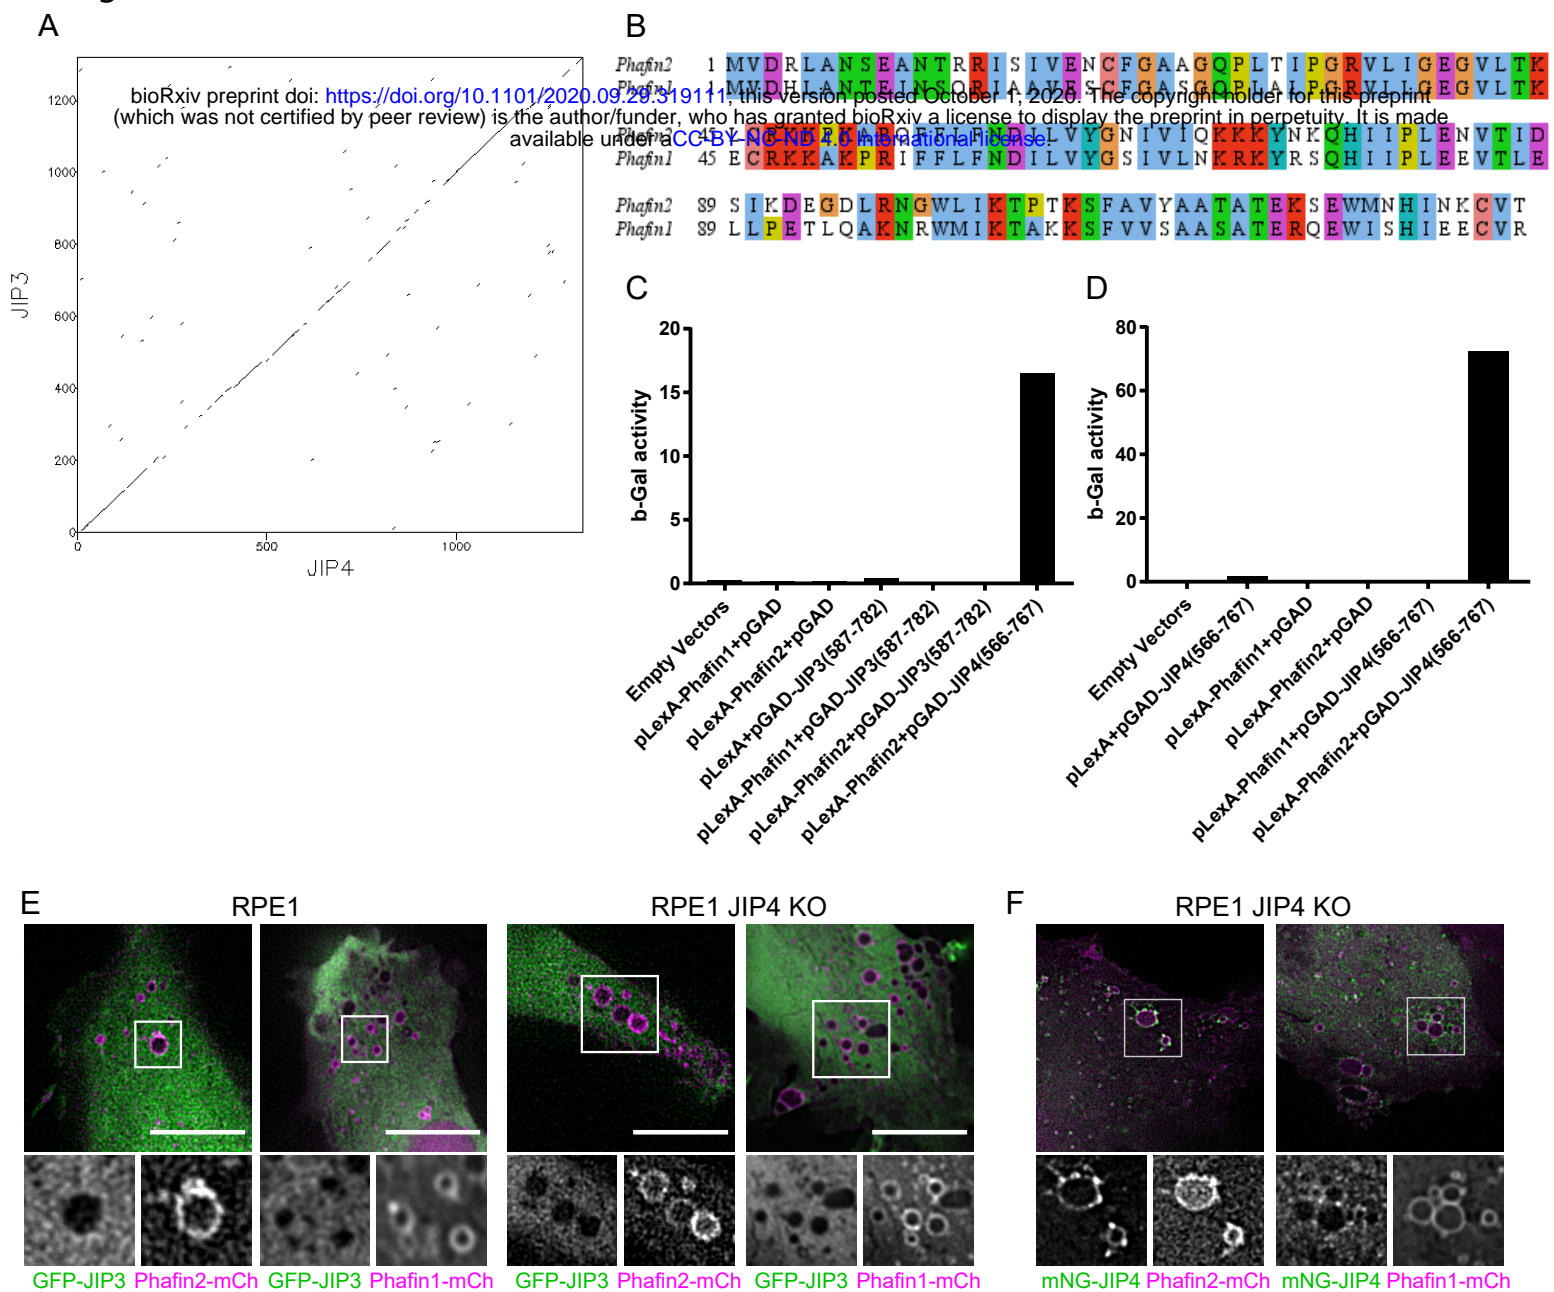

**Figure 3: JIP4 and Phafin2 interaction is not shared with their respective isoforms.** A) Dotplot of human JIP3 against human JIP4. Similarity matching using BLOSUM62 with a sliding window of 5 residues and a threshold score of 20 [33]. Note the unevenly distributed regions of high sequence conservation. B) Sequence alignment of the Phafin2 and Phafin1 PH domain. C)  $\beta$ -galactosidase activity derived from yeast 2-hybrid assay expressing the specified constructs. Representative of 3 independent experiments. D)  $\beta$ -galactosidase activity derived from yeast 2-hybrid assay expressing the specified constructs. Representative of 3 independent experiments. E) Representative images of cells of the indicated genotypes expressing mNeonGreen JIP3 and a Phafin isoform. JIP3 is not recruited to macropinosomes. Scale bars are 10 $\mu$ m. F) Representative JIP4 KO cell expressing mNeonGreen-JIP4 and a Phafin isoform. Phafin1 does not recruit JIP4.

# Figure 4

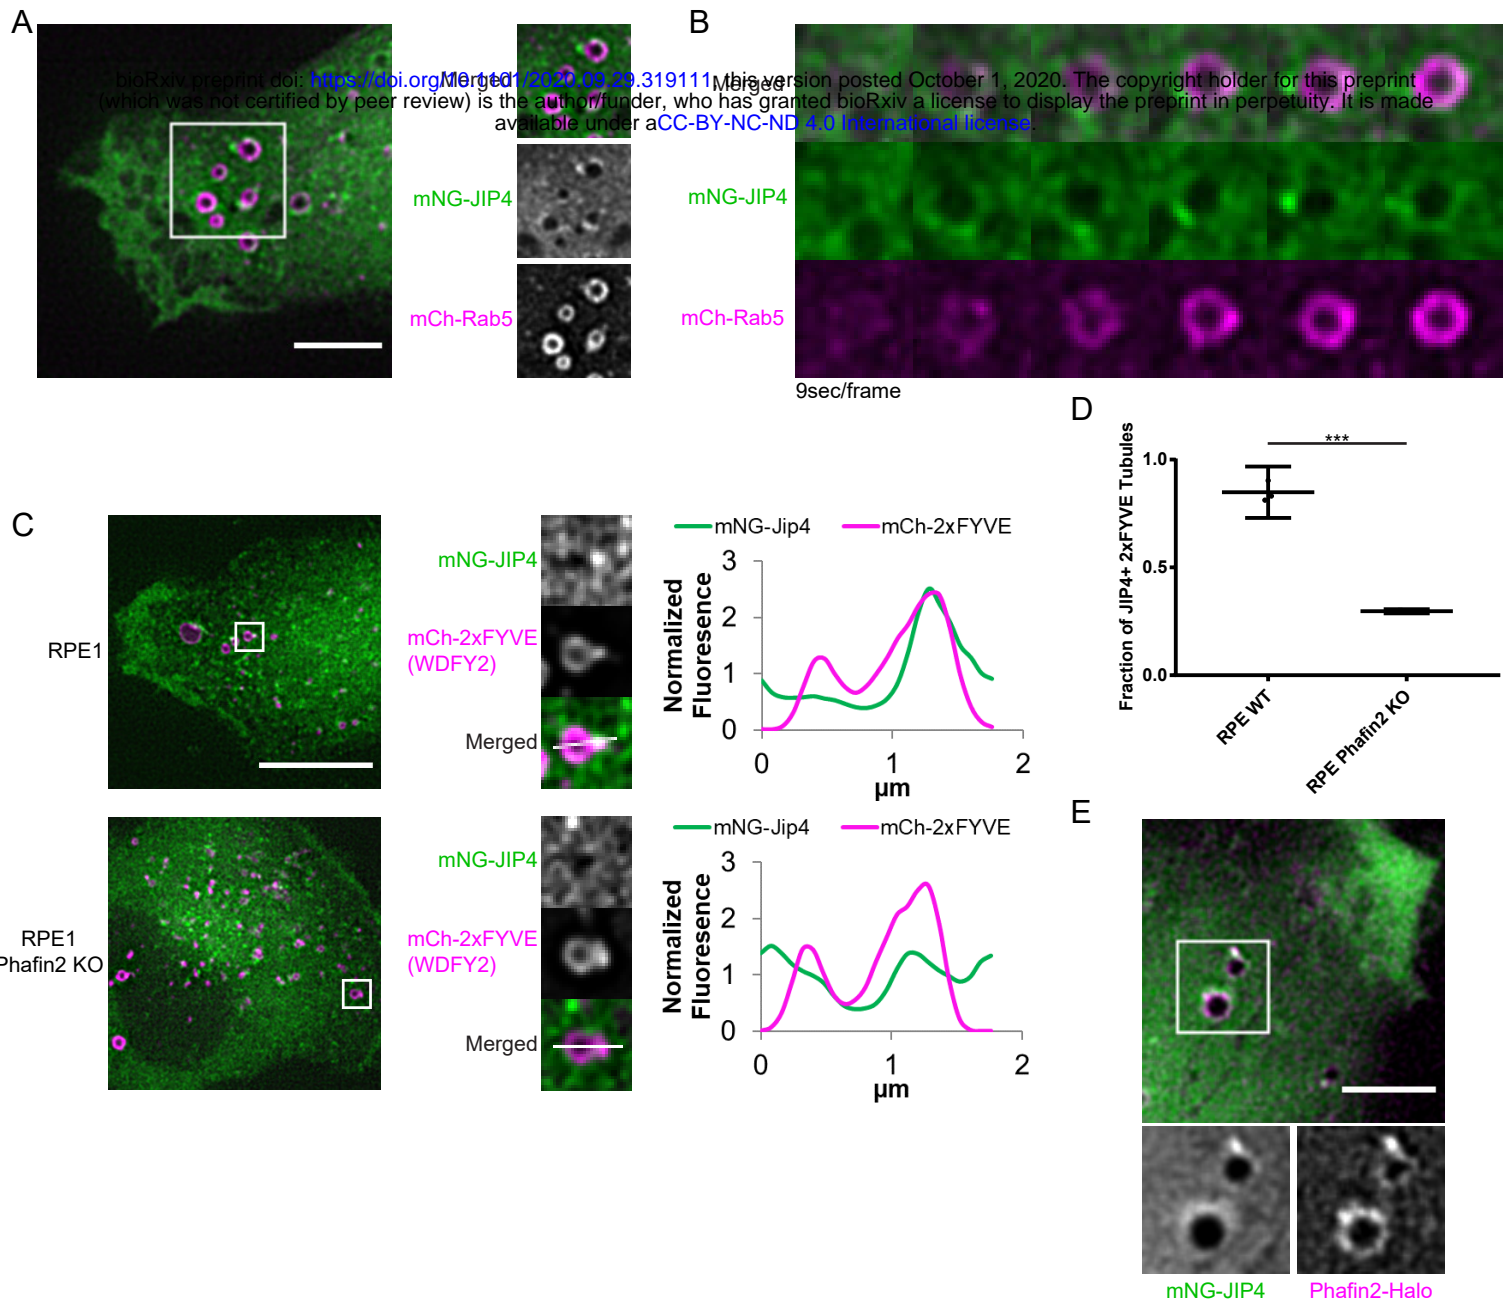

**Figure 4: JIP4 is recruited to macropinosome tubules by Phafin2.** A) Representative image of RPE1 cell expressing mNeonGreen-JIP4 and mCherry-Rab5, imaged live. B) Montage gallery of a macropinosome as it matures into a Rab5 positive early macropinosome and acquires JIP4. C) Representative images and magnifications of RPE1 cells of the specified genotype expressing mNeonGreen-Jip4 and mCherry-2xFYVE(WDFY2). Line plots are taken along the indicated line from left to right. Scale bar is 10 μm. D) Fraction of 2xFYVE(WDFY2) tubules per cell positive for mNG-JIP4. Positive threshold set at 1.5x cytoplasmic fluorescence. Mean of 3 experiments +/- s.e.m. shown. (42-105 events per condition per experiment) E) Representative image of an RPE1 cell expressing mNeonGreen-JIP4 and weakly expressing Phafin2-Halotag. Note that both Phafin2 and JIP4 stand out strongly against the diffuse cytoplasmic fluorescence on tubules. Scale bar is 5μm.

Figure 5

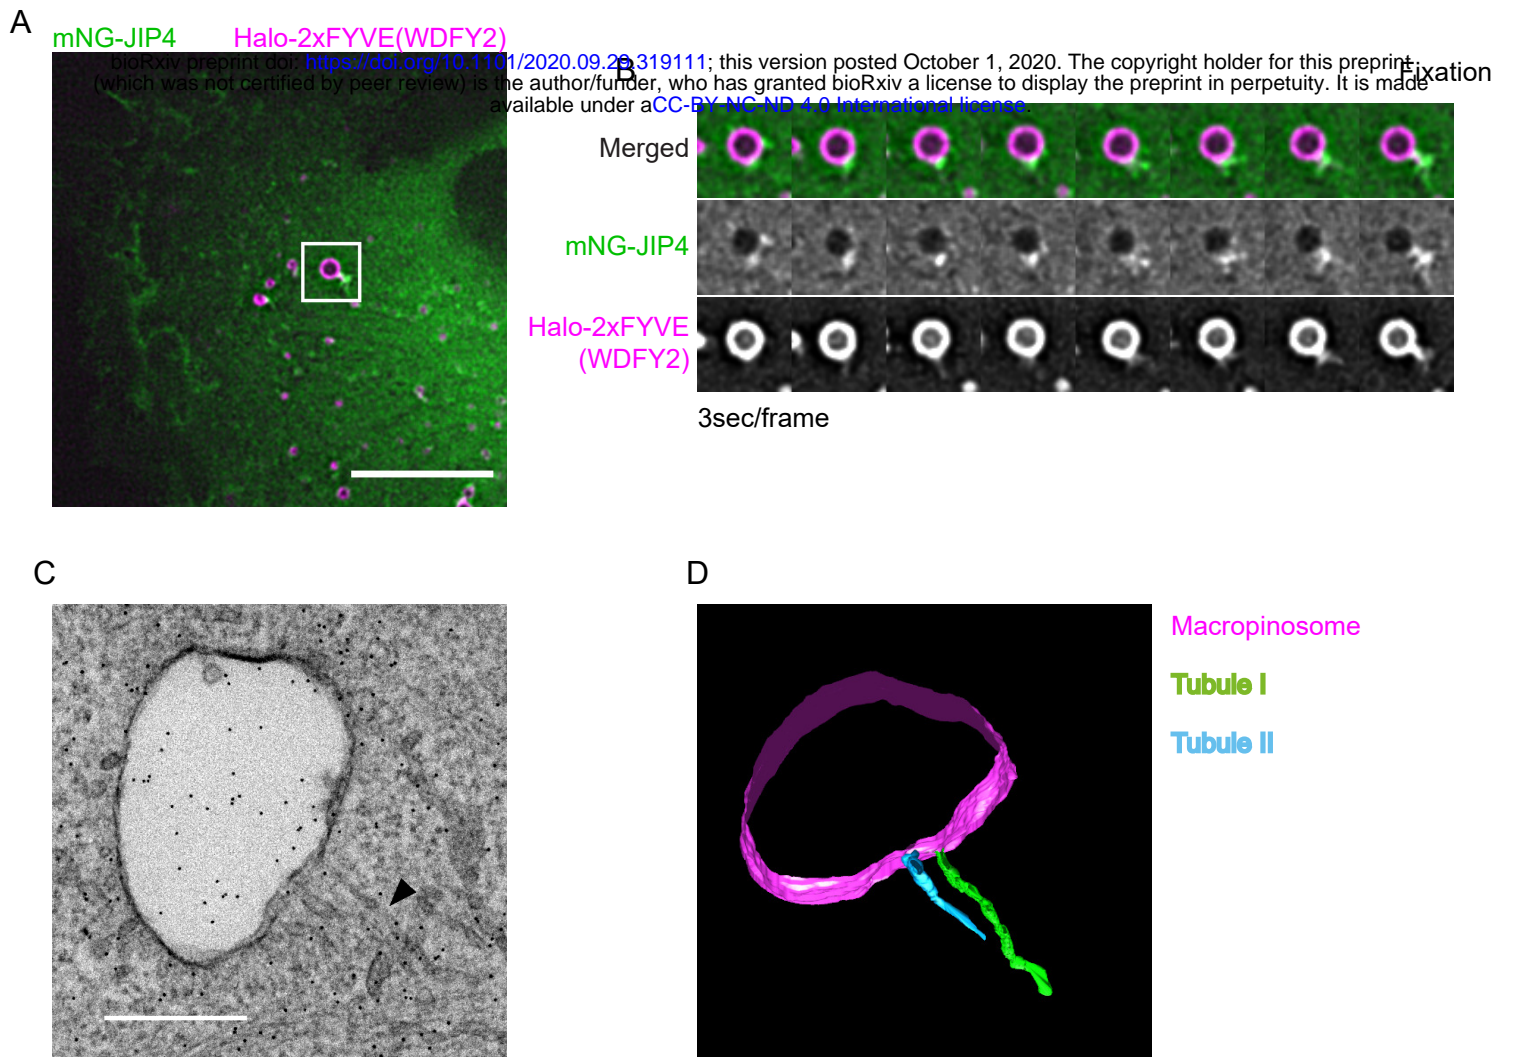

**Figure 5: JIP4 tubules are extruded and continuous with macropinosomes.** A) Image of RPE1 cell expressing mNeonGreen-JIP4 and Halo-2xFYVE(WDFY2), imaged live during preparation of the CLEM specimen. Scale bar is 5 $\mu$ m. B) Timelapse montage of the tubulating macropinosome until glutaraldehyde fixation. C) Electron micrograph of the macropinosome depicted in (A) and (B). Black dots are gold fiducial markers for electron tomography. The longest tubule emanating from the JIP4 concentration is marked with a black arrowhead. Scale bar is 500nm. D) Model reconstructed from electron tomograph of the macropinosome depicted in (C). The limiting membrane of the macropinosome is in magenta, two separate emanating tubules are in green and blue. The green tubule corresponds to the tubule indicated in (C).

**Figure 6**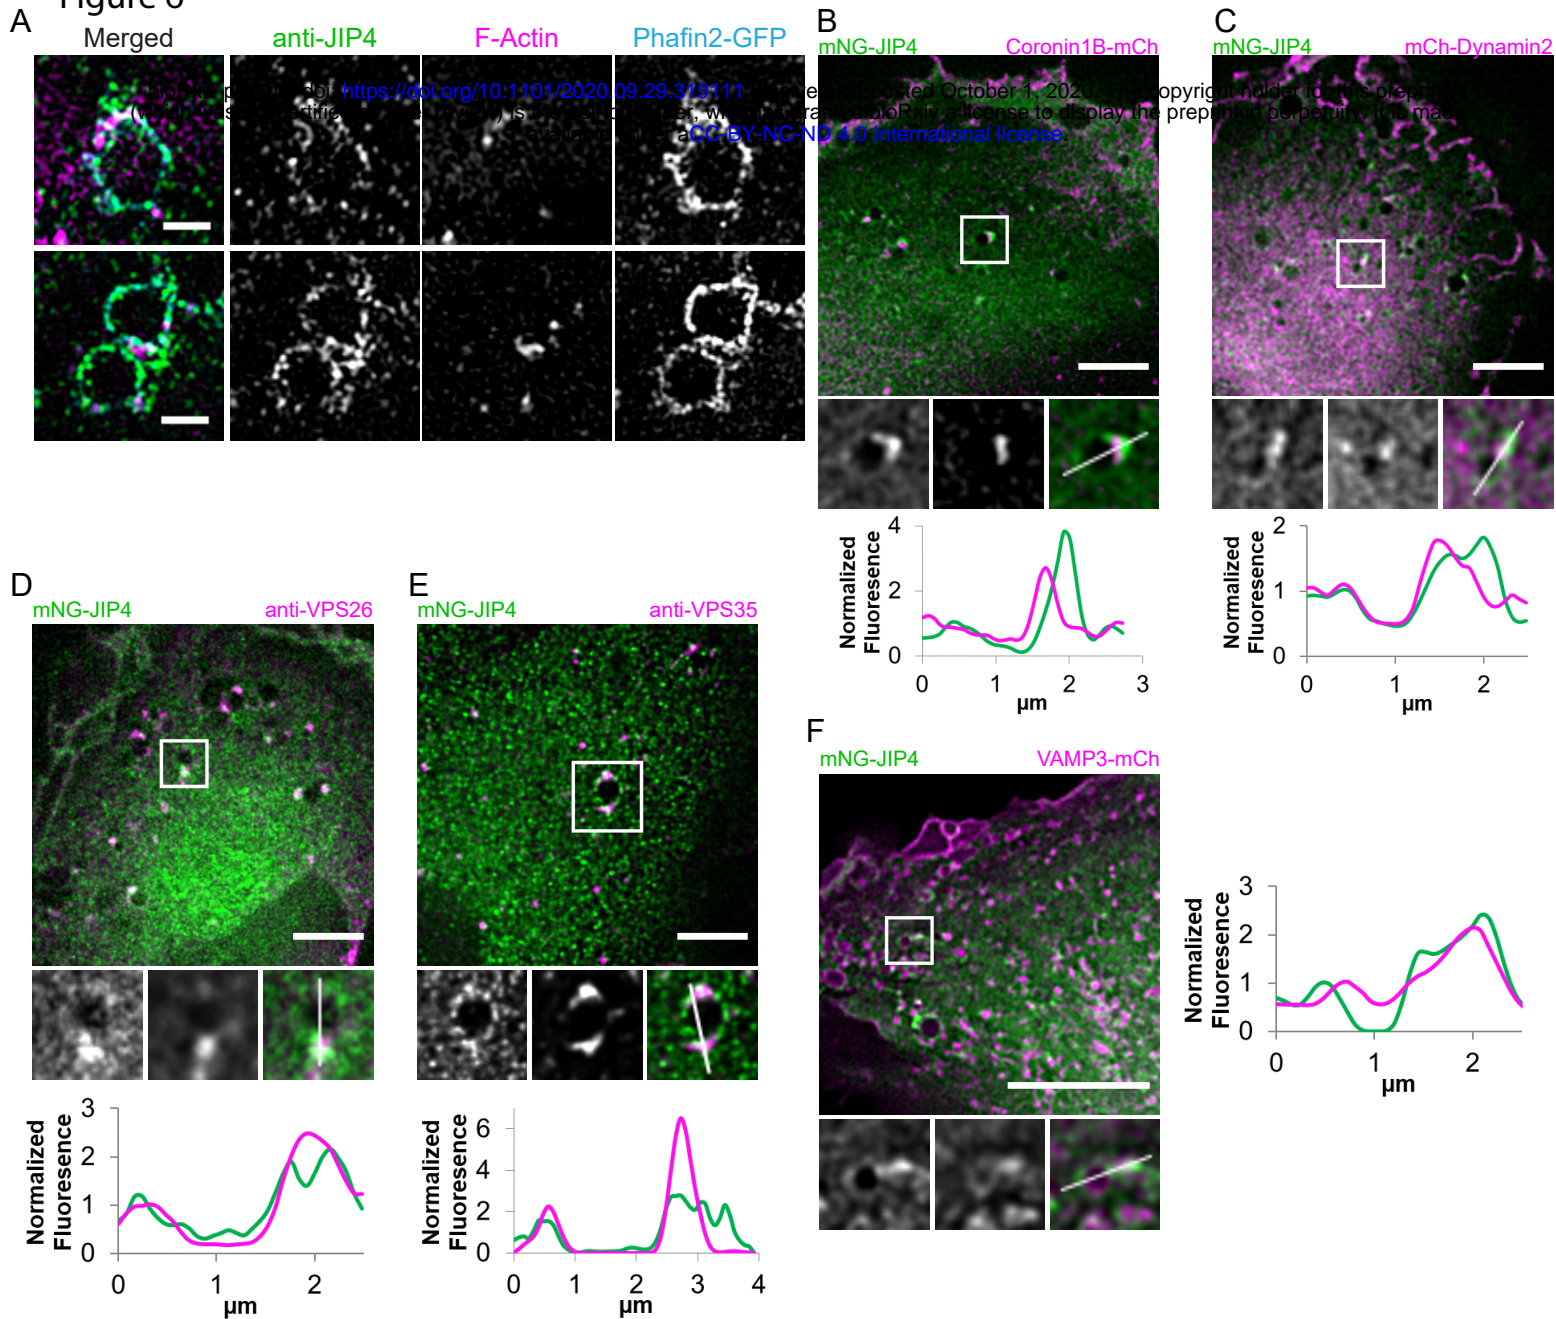

**Figure 6: JIP4 tubules bear markers of membrane recycling zones.** A) Structured illumination microscopy (SIM) images from two cells expressing Phafin2-GFP, fixed, immunostained against JIP4 and stained for F-actin with phalloidin. Scale bar is 1µm. B) Representative image of RPE1 cell expressing mNeonGreen-JIP4 and Coronin1B-mCherry. Line profile taken along the indicated line from left to right. C) Representative image of RPE1 cell expressing mNeonGreen-JIP4 and Dynamin2-mCherry. Line profile taken along the indicated line from left to right. D) Representative image of RPE1 cell expressing mNeonGreen-JIP4, fixed and immunostained for VPS26. Line profile taken along the indicated line from top to bottom. E) Representative image of RPE1 cell expressing mNeonGreen-JIP4, fixed and immunostained for VPS35. Line profile taken along the indicated line from top to bottom. F) Representative image of RPE1 cell expressing mNeonGreen-JIP4 and VAMP3-mCherry. Line profile taken along the indicated line from left to right. Scale bars in B, C, D, E, and F are 5µm.

## Figure 7

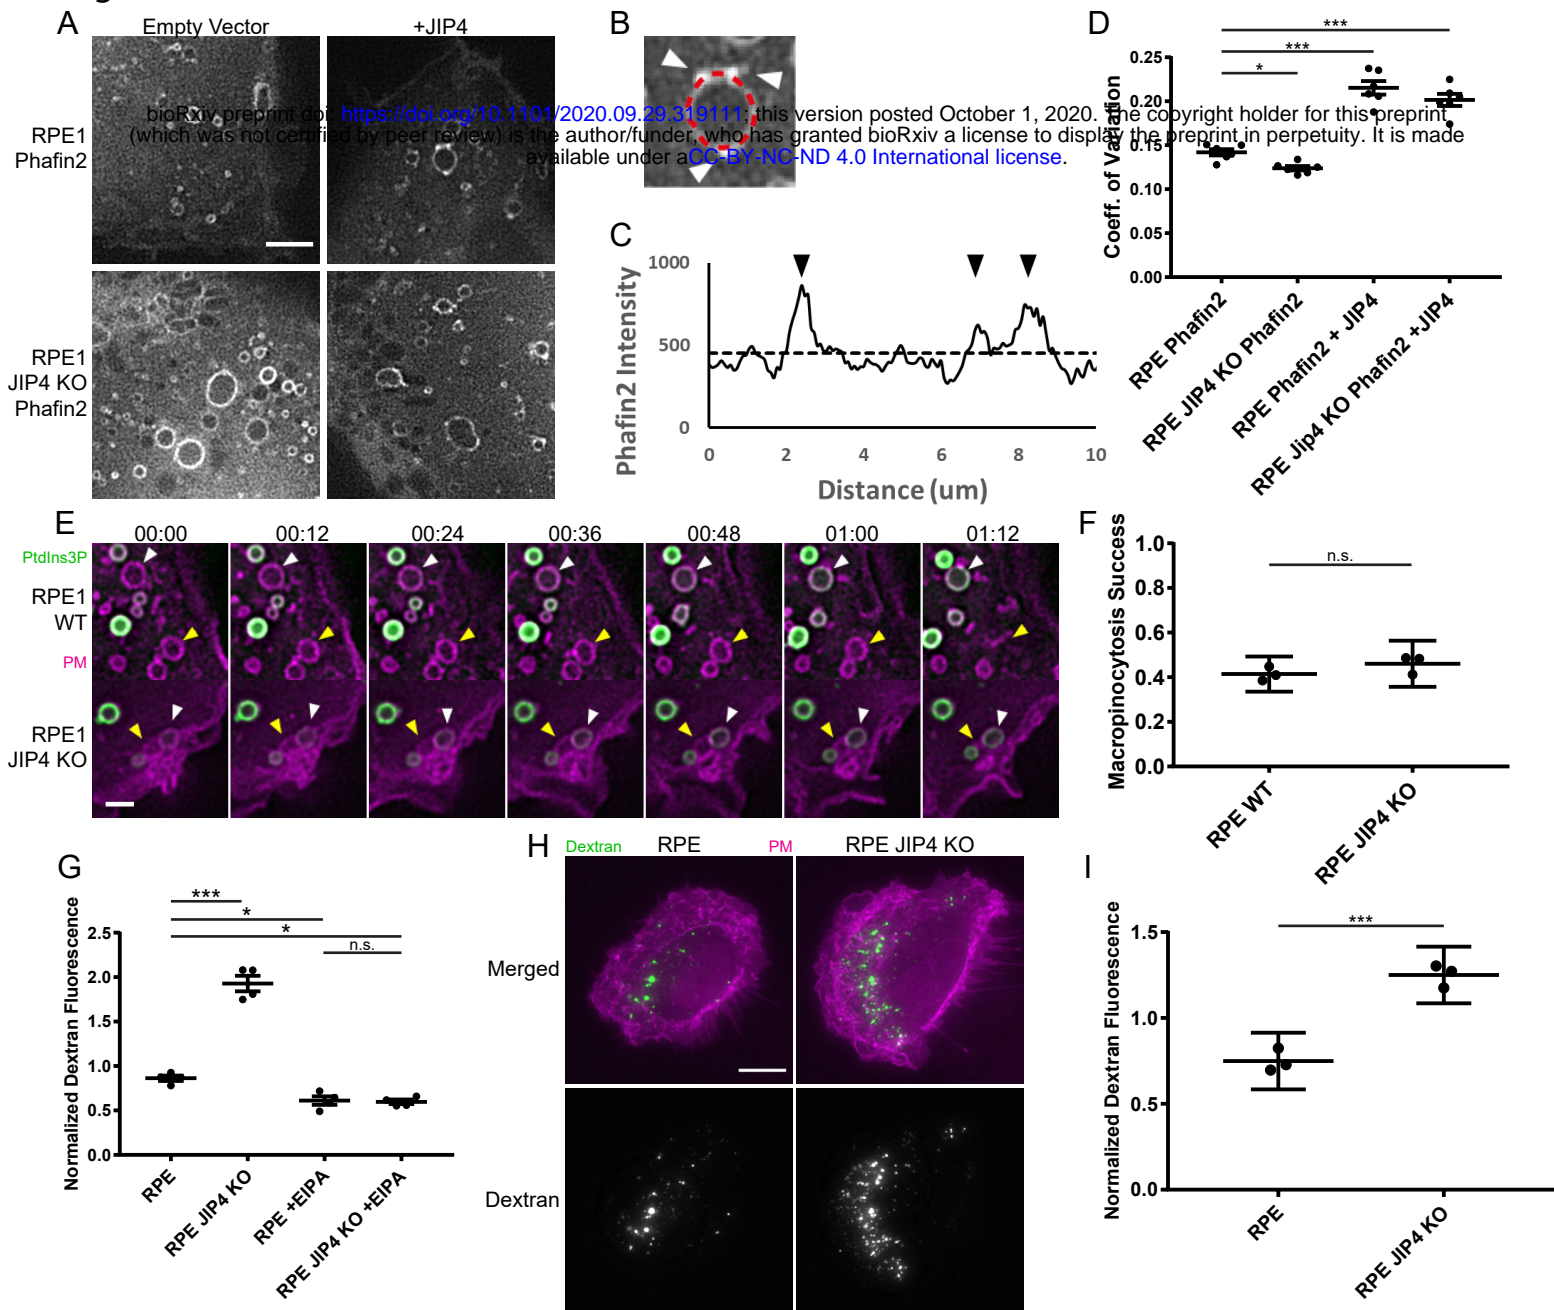

**Figure 7: JIP4 promotes tubulation from macropinosomes.** A) Representative images of RPE1 cells of the indicated genotypes expressing the specified constructs. The Phafin2 channel is shown. Scale bar is 5µm. B) Example macropinosome, in the Phafin2 channel, depicting the measurement of Phafin2 fluorescence intensity along the limiting membrane of the macropinosome in red dashed line. White arrowheads indicate Phafin2 accumulation at tubule nucleating spots. Note the tubule beginning to extend from the nucleating spot on the top right. C) Line profile of Phafin2 fluorescence intensity taken along the line marked in (B). Black arrowheads correspond to the Phafin2 accumulations in (B). Black dotted line indicates mean of lineplot. D) Coefficient of variation of Phafin2 fluorescence intensity along lineplots taken around macropinosomes >1µm in diameter as in (B), of the indicated genotypes. Mean of 6 experiments shown +/- 95% C.I. (21-72 macropinosomes per condition per experiment) E) Timelapse images of RPE1 cells of the indicated genotypes expressing mNeonGreen-2xFYVE as a PtdIns3P marker and Myrpalm-mCherry as a plasma membrane marker. The yellow arrowheads indicate a macropinosome that fails to mature to an early macropinosome and re-fuses with the plasma membrane. The white arrowheads indicate a macropinosome that matures to an early macropinosome and acquires 2xFYVE. F) Fraction of macropinosomes per cell that successfully mature into an early macropinosome. Mean of 3 experiments shown. Error bars are 95% C.I. (10-15 cells per genotype per experiment) G) Median fluorescence of 20000 cells of the indicated genotype/treatment after 30min uptake of fluorescent 10kDa dextran, measured by flow cytometry. Mean of 4 experiments shown +/- 95% C.I. H) Representative images of RPE1 cells of the indicated genotype after 30min uptake of fluorescent dextran. A plasma membrane marker (fluorescent Wheat Germ Agglutinin) is shown in magenta. I) Total dextran fluorescence per cell of the indicated genotypes after a 30min uptake of fluorescent dextran. Mean of 3 experiments shown +/- 95% C.I. (15-20 cells per genotype per experiment)



# Figure 8

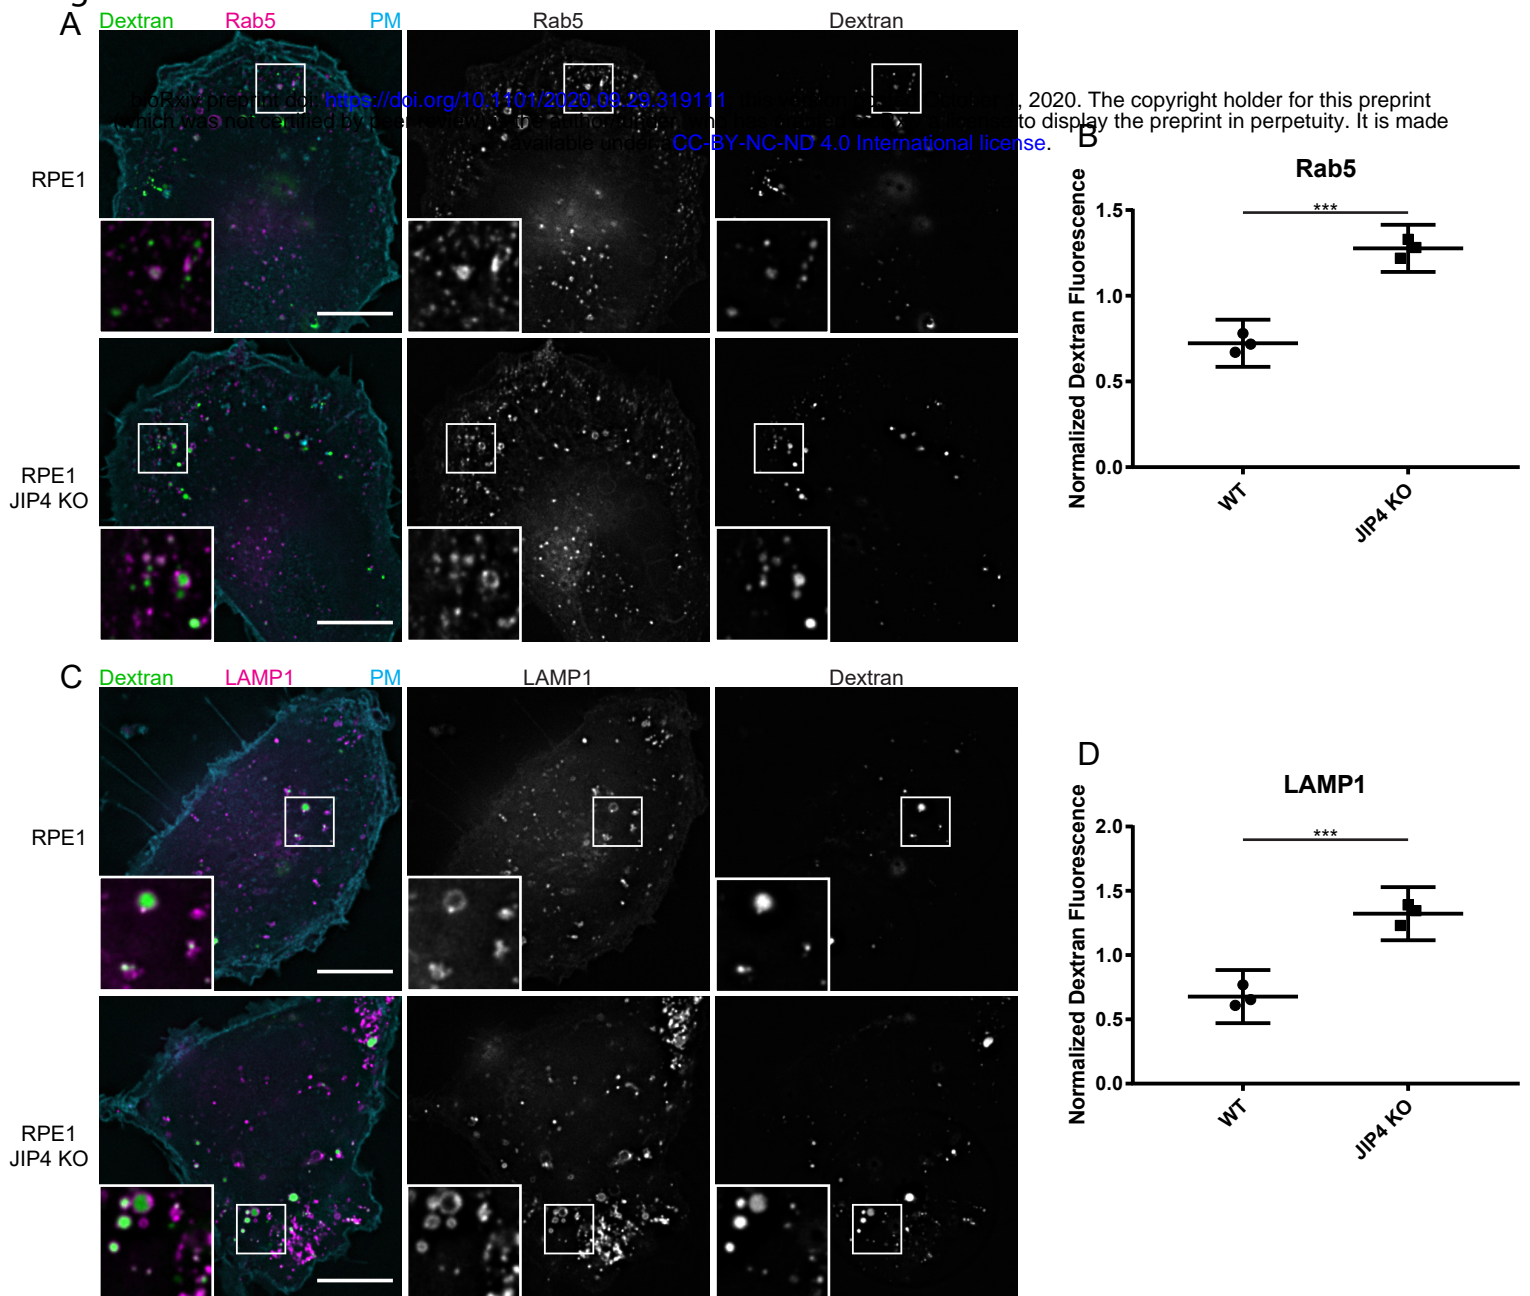

**Figure 8: Increased dextran retention in JIP4 KO cells.** A) Representative images of RPE1 cells of the indicated genotypes expressing mCherry-Rab5 after a 30min uptake of fluorescent dextran. Scale bar is 5µm. B) Dextran fluorescence in Rab5 positive compartments per cell of the indicated genotype after 30min uptake of fluorescent dextran. Mean of 3 experiments shown +/- 95% C.I. (15-20 cells per genotype per experiment) C) Representative images of RPE1 cells of the indicated genotypes expressing mCherry-LAMP1 after a 30min uptake of fluorescent dextran. Scale bar is 5µm. D) Dextran fluorescence in LAMP1 positive compartments per cell of the indicated genotype after 30min uptake of fluorescent dextran. Mean of 3 experiments shown +/- 95% C.I. (15-20 cells per genotype per experiment)

# Supplemental Figure 1

bioRxiv preprint doi: <https://doi.org/10.1101/2020.09.29.319111>; this version posted October 1, 2020. The copyright holder for this preprint (which was not certified by peer review) is the author/funder, who has granted bioRxiv a license to display the preprint in perpetuity. It is made available under a [CC-BY-NC-ND 4.0 International license](#).

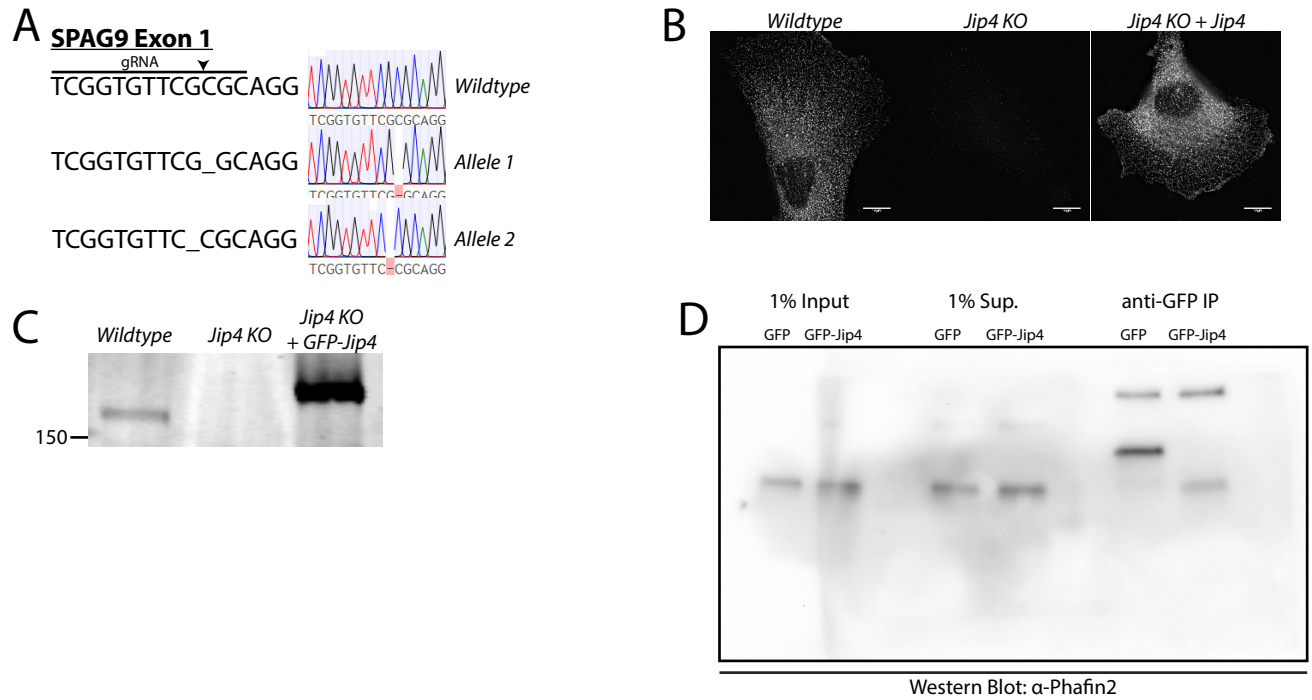

Supplemental Figure 1: Generation and verification of RPE1 JIP4 knockout cell line. A) Guide RNA for CRISPR/Cas9 knockout. The predicted cut site is indicated. Sanger sequencing chromatograms show different frameshift insertions for both alleles. No wildtype sequencing results were recovered from the JIP4 KO cell line. B) Immunofluorescence using anti-JIP4. Images were acquired at the same settings and presented with equal brightness scaling. C) Western blot using anti-JIP4 on cell lysate from wildtype, JIP4 KO, and JIP4 KO expressing GFP-JIP4.
